# Supplementary material for: An fNIRS-based investigation of visual merchandising displays for fashion stores
Source: PLoS One. 2018 Dec 11;13(12):e0208843. doi: 10.1371/journal.pone.0208843 (PMC6289445; doi:10.1371/journal.pone.0208843)
Supplement: S1 File — The dataset for the four stores with positive/negative display stimulation (averaged over 20 subjects). To understand our work, fNIRS task-related data were provided as supporting information. (XLSX) [file pone.0208843.s001.xlsx]

## Sheet: MP
The data set of averaged HbOs for 20 subjects: Menswear positive display
Data Points	Ch 1	Ch 2	Ch 3	Ch 4	Ch 5	Ch 6	Ch 7	Ch 8	Ch 9	Ch 10	Ch 11	Ch 12	Ch 13	Ch 14	Ch 15	Ch 16
1	0	0	0	0	0	0	0	0	0	0	0	0	0	0	0	0
2	0.00394416	-0.00224748	0.0120677	-0.00620455	0.00981762	0.00371382	0.00544633	-0.00682337	0.00244968	-0.0056155	0.00916908	-0.000394421	0.0185823	0.00038905	0.0125681	0.00696608
3	0.0054195	-0.00581396	0.0226316	-0.0140008	0.0206349	0.00623707	0.0104257	-0.0109357	0.00491163	-0.00854569	0.0201442	0.00106577	0.0339575	-0.00198593	0.0256735	0.0124799
4	0.00523362	-0.00981322	0.029979	-0.0214304	0.0315048	0.00742909	0.0148273	-0.0107229	0.00723931	-0.00751348	0.0334899	0.00553667	0.0456214	-0.00515679	0.0377339	0.0183602
5	0.00426689	-0.0133535	0.0327154	-0.0267941	0.0412579	0.00780439	0.0180129	-0.00584285	0.00942722	-0.0025777	0.0488009	0.0134091	0.0545079	-0.00679748	0.047452	0.0264574
6	0.00299503	-0.0158263	0.0303253	-0.0293148	0.0491908	0.00826202	0.0191603	0.00278199	0.0116035	0.00500528	0.0649173	0.0241859	0.0623272	-0.00521063	0.0543569	0.0378027
7	0.00132754	-0.0172268	0.0233197	-0.0294349	0.0552232	0.00936486	0.0177054	0.0132957	0.0138843	0.0133065	0.0803102	0.0364167	0.0703308	-8.13989e-05	0.0588905	0.0520323
8	-0.00113459	-0.0182946	0.0129583	-0.0285318	0.0594993	0.0108313	0.0135626	0.0233999	0.0162953	0.0204692	0.0934318	0.0480017	0.0784255	0.00748374	0.0620498	0.0674463
9	-0.00459886	-0.0202291	0.000798645	-0.0281607	0.0619372	0.0117659	0.00699357	0.0309149	0.0187584	0.0253071	0.102929	0.0568472	0.0852538	0.015695	0.0648275	0.0816496
10	-0.00875628	-0.0240532	-0.0117123	-0.0292995	0.0622124	0.0114537	-0.00170254	0.0343165	0.0210403	0.0275137	0.107758	0.0615466	0.0892187	0.0231251	0.067828	0.0924718
11	-0.0127727	-0.0299431	-0.0234904	-0.0320451	0.0601296	0.0100348	-0.0124	0.0330785	0.0226688	0.0274092	0.107292	0.0616097	0.089594	0.0293213	0.0711639	0.098733
12	-0.0154797	-0.0369446	-0.0338695	-0.0358056	0.0560015	0.00847816	-0.0250358	0.0276632	0.0230893	0.0256126	0.101552	0.0572804	0.0870043	0.034637	0.0745952	0.100557
13	-0.0157921	-0.0433697	-0.0425361	-0.0398068	0.0505713	0.00785047	-0.0392553	0.0191899	0.02209	0.0228722	0.0914966	0.0492688	0.0831184	0.0395992	0.0777137	0.0991941
14	-0.0131732	-0.0476675	-0.04938	-0.0435086	0.044502	0.00844942	-0.0540883	0.00900202	0.0201401	0.0200395	0.0791275	0.0386595	0.0799154	0.0443808	0.0799882	0.0964485
15	-0.00807822	-0.0493205	-0.0544146	-0.0467773	0.0378722	0.00942684	-0.067973	-0.00163292	0.0182029	0.0178376	0.0671482	0.0268336	0.0788931	0.0485798	0.0807999	0.0939285
16	-0.00202327	-0.0492497	-0.0578001	-0.0498084	0.0302064	0.00916963	-0.0792029	-0.0116247	0.0170746	0.0164069	0.0580706	0.0152057	0.0804695	0.051233	0.0796243	0.0924481
17	0.00296515	-0.0494339	-0.0598109	-0.0528466	0.0212003	0.00625221	-0.086534	-0.0200904	0.0169221	0.0150625	0.0532971	0.00488156	0.083832	0.0510481	0.0764301	0.0918992
18	0.00531391	-0.0519464	-0.0607424	-0.05598	0.0114945	0.000255415	-0.0897117	-0.0265681	0.0175427	0.0126982	0.0527361	-0.00352521	0.0874009	0.0469362	0.0719843	0.0916362
19	0.0046594	-0.0579634	-0.0608241	-0.0591908	0.00274884	-0.00812333	-0.0896028	-0.0312973	0.019	0.00859168	0.0551936	-0.00985109	0.089707	0.0386808	0.0676743	0.0910673
20	0.0019054	-0.067255	-0.0602498	-0.062636	-0.00321593	-0.0177321	-0.0879141	-0.0352852	0.0217774	0.00287075	0.0591818	-0.0143295	0.0901184	0.0272648	0.0648227	0.0900047
21	-0.00145172	-0.0784551	-0.0592987	-0.0668369	-0.00553289	-0.0277292	-0.0864977	-0.0398087	0.0261567	-0.00375803	0.063586	-0.0175818	0.0889473	0.0145696	0.0639993	0.0886504
22	-0.00423474	-0.0898508	-0.0585068	-0.0725703	-0.00480596	-0.0377993	-0.0865652	-0.0456037	0.0313741	-0.0106966	0.0677647	-0.0205868	0.0868961	0.00264258	0.0648611	0.0873251
23	-0.00618182	-0.100244	-0.0588049	-0.0805287	-0.002726	-0.0477214	-0.0881952	-0.0522714	0.0355249	-0.0177788	0.0711377	-0.0244395	0.0843719	-0.00692794	0.0665818	0.0862295
24	-0.00796554	-0.109385	-0.0614819	-0.0910481	-0.00122972	-0.0568885	-0.090499	-0.058462	0.0364248	-0.0250768	0.0726738	-0.0299966	0.0812048	-0.01328	0.0683841	0.0853426
25	-0.0107399	-0.117782	-0.0677405	-0.103972	-0.00181188	-0.0643626	-0.0923496	-0.0627168	0.0328511	-0.0325332	0.0709399	-0.0375638	0.0769524	-0.0162761	0.0697749	0.0844659
26	-0.0155255	-0.126112	-0.0779356	-0.118599	-0.00528477	-0.069471	-0.0931397	-0.0643788	0.0252273	-0.0398287	0.0648643	-0.0467645	0.0714764	-0.0164265	0.0705142	0.0833678
27	-0.0227323	-0.134642	-0.0909753	-0.13364	-0.0118403	-0.0722959	-0.0930415	-0.0639287	0.0152872	-0.046536	0.0546408	-0.0565999	0.0652418	-0.0147888	0.0705472	0.0819122
28	-0.0319458	-0.143031	-0.104459	-0.147317	-0.0210669	-0.0735517	-0.0926274	-0.0625419	0.00504479	-0.0522091	0.0419372	-0.065663	0.0591357	-0.0126677	0.0699852	0.0800947
29	-0.0420436	-0.150556	-0.115651	-0.157733	-0.0318698	-0.0739822	-0.0922937	-0.0612605	-0.00418613	-0.0563829	0.0290239	-0.0725206	0.0539332	-0.0112294	0.0689667	0.0778931
30	-0.0515773	-0.156447	-0.122667	-0.16342	-0.0425181	-0.0738413	-0.092022	-0.0603993	-0.0121294	-0.0585765	0.017514	-0.0761842	0.0498905	-0.0111355	0.0673857	0.0750647
31	-0.0592735	-0.160074	-0.125161	-0.163884	-0.0511513	-0.0729315	-0.0916413	-0.0596723	-0.0192006	-0.0584942	0.00772099	-0.076511	0.0466019	-0.0124497	0.0647289	0.0710737
32	-0.0644083	-0.160922	-0.124103	-0.15983	-0.0564977	-0.0709818	-0.0911976	-0.0588552	-0.0258418	-0.0562043	-0.000874056	-0.0742601	0.0431917	-0.0147829	0.0603181	0.0653647
33	-0.0668741	-0.158562	-0.120955	-0.15288	-0.0582969	-0.0679	-0.0909469	-0.0583731	-0.0320598	-0.052155	-0.00858918	-0.0707611	0.0386686	-0.017522	0.0538787	0.0578799
34	-0.0669485	-0.152848	-0.116893	-0.144918	-0.0571229	-0.0637309	-0.0910146	-0.0592807	-0.0373759	-0.0470003	-0.014935	-0.0674141	0.0323738	-0.0200819	0.0459473	0.0493378
35	-0.0649764	-0.144211	-0.11247	-0.13741	-0.0538262	-0.058502	-0.0910924	-0.0625762	-0.0410504	-0.0414253	-0.0189195	-0.0652932	0.0243996	-0.0220902	0.0377492	0.0409973
36	-0.0611926	-0.133758	-0.107736	-0.131082	-0.0490884	-0.0522625	-0.0905627	-0.0684199	-0.0423563	-0.0361082	-0.0198546	-0.0649748	0.0157474	-0.0235127	0.030608	0.0339923
37	-0.0557738	-0.122982	-0.10261	-0.126073	-0.0433221	-0.0453218	-0.0889419	-0.0758435	-0.0407717	-0.0317433	-0.0179213	-0.0665681	0.00802773	-0.0246478	0.0253054	0.0287723
38	-0.0489953	-0.113271	-0.097237	-0.122274	-0.0368065	-0.0384412	-0.0862563	-0.0831425	-0.0361908	-0.0289627	-0.0141074	-0.0697611	0.00282505	-0.0258369	0.0218215	0.0250518
39	-0.0414262	-0.105596	-0.0922531	-0.119623	-0.0299526	-0.0328549	-0.0830898	-0.0886792	-0.0292329	-0.0282506	-0.00970967	-0.0739359	0.000982115	-0.0271607	0.0195043	0.022117
40	-0.0340111	-0.100555	-0.0888139	-0.118245	-0.0236172	-0.0301684	-0.0803153	-0.0915721	-0.0214959	-0.0298733	-0.00584758	-0.0783483	0.00218888	-0.0283621	0.0174864	0.0192193
41	-0.0278628	-0.0984737	-0.0881258	-0.118346	-0.0191669	-0.0320252	-0.07863	-0.0918595	-0.015383	-0.0338605	-0.0031502	-0.0822886	0.00506784	-0.0291374	0.0150876	0.0159014
42	-0.0238134	-0.0993114	-0.0906488	-0.119953	-0.0180084	-0.0394826	-0.0781316	-0.0901562	-0.0132061	-0.0399195	-0.00166682	-0.0851237	0.00773548	-0.0295254	0.0121254	0.0122717
43	-0.0220451	-0.10251	-0.095526	-0.122654	-0.0206994	-0.0522639	-0.0781923	-0.0871062	-0.0159985	-0.0473352	-0.00094832	-0.0862806	0.00861432	-0.0300001	0.00899963	0.00905871
44	-0.0220839	-0.107044	-0.100809	-0.125531	-0.0262795	-0.0684092	-0.0777066	-0.0829955	-0.0228198	-0.0549848	-0.0002794	-0.085329	0.00712842	-0.0311778	0.00651492	0.00722143
45	-0.0232019	-0.111769	-0.104351	-0.12741	-0.0324231	-0.0846712	-0.0755888	-0.077698	-0.0311051	-0.061528	0.00108231	-0.082174	0.00401112	-0.0333294	0.00553095	0.00728078
46	-0.0248601	-0.115795	-0.104712	-0.127308	-0.036419	-0.0975925	-0.0711697	-0.0709365	-0.037953	-0.0657955	0.00370304	-0.0771704	0.0010372	-0.0360949	0.0065226	0.00879676
47	-0.0267828	-0.11858	-0.101408	-0.124768	-0.0363247	-0.104655	-0.0643005	-0.0626753	-0.0414611	-0.0670651	0.0078699	-0.0709191	0.000277982	-0.0385667	0.00924702	0.0104468
48	-0.0286732	-0.119787	-0.094679	-0.11994	-0.0316083	-0.104972	-0.0552925	-0.0534381	-0.0413435	-0.065116	0.0135373	-0.0639215	0.00313981	-0.0397084	0.0126329	0.0106473
49	-0.029969	-0.119119	-0.085218	-0.113402	-0.0230674	-0.0993164	-0.0448864	-0.0443344	-0.0386771	-0.0601811	0.0203455	-0.0564328	0.00962118	-0.0389039	0.0150204	0.00826774
50	-0.0299952	-0.116286	-0.0741556	-0.105938	-0.0122525	-0.0895632	-0.0342214	-0.0366793	-0.0351474	-0.052916	0.0277023	-0.0486557	0.0182318	-0.036321	0.014835	0.0030824
51	-0.0284388	-0.111116	-0.0630274	-0.0983916	-0.000799668	-0.0778352	-0.0246573	-0.0313917	-0.0323591	-0.0444532	0.0349063	-0.041043	0.0266758	-0.0328855	0.0114732	-0.00418161
52	-0.0256963	-0.103712	-0.0533879	-0.0915796	0.0100273	-0.0656893	-0.0174316	-0.0285417	-0.0314451	-0.036284	0.0412594	-0.0343276	0.0329827	-0.0297806	0.00589644	-0.0120767
53	-0.0227738	-0.0945804	-0.0461542	-0.0861262	0.019438	-0.0537509	-0.0132757	-0.0273644	-0.0328061	-0.0298533	0.0461067	-0.029217	0.0364056	-0.0277394	0.000434097	-0.0188065
54	-0.0207867	-0.0845941	-0.041173	-0.0821445	0.0269482	-0.0419282	-0.012232	-0.0267086	-0.0359088	-0.0259825	0.0488744	-0.0260184	0.0375651	-0.0266104	-0.00232297	-0.0227148
55	-0.0204307	-0.0747595	-0.0374126	-0.0790024	0.0321475	-0.0300534	-0.0137225	-0.025575	-0.0392978	-0.02448	0.0491954	-0.0244476	0.037851	-0.0254821	-0.000906156	-0.0227857
56	-0.0218038	-0.0659059	-0.0337991	-0.0756042	0.0346258	-0.0185501	-0.0167395	-0.0233851	-0.0411329	-0.0242441	0.0471125	-0.0237511	0.0385198	-0.0233251	0.00424109	-0.0190258
57	-0.0246272	-0.0585323	-0.0301564	-0.0712176	0.0340967	-0.00871888	-0.0200212	-0.0199322	-0.040089	-0.0239031	0.0431942	-0.0230597	0.0400349	-0.0197037	0.011105	-0.0124493
58	-0.0284701	-0.0528725	-0.0275505	-0.0662736	0.0306076	-0.00239984	-0.022239	-0.0152272	-0.0359842	-0.0225346	0.0384656	-0.0217414	0.0419631	-0.0150404	0.0173641	-0.00454724
59	-0.0326623	-0.0489927	-0.0276326	-0.0622859	0.024728	-0.00100848	-0.0223154	-0.00942909	-0.0295255	-0.019916	0.0342386	-0.0194831	0.043481	-0.0101482	0.0217643	0.00359633
60	-0.036045	-0.0468469	-0.0313691	-0.0607951	0.0175507	-0.004424	-0.019903	-0.00295072	-0.0214743	-0.0162312	0.0318953	-0.0160895	0.0441959	-0.00533231	0.0247421	0.0119931
61	-0.0370357	-0.0462918	-0.0380961	-0.0620973	0.0104179	-0.010564	-0.0157371	0.00344695	-0.0120614	-0.0116059	0.0325886	-0.0112663	0.0446749	9.09397e-05	0.0278959	0.0216638
62	-0.0342807	-0.0470974	-0.0455935	-0.0647844	0.00455249	-0.0161231	-0.0114059	0.00884755	-0.00116268	-0.00588877	0.0368659	-0.00457831	0.0462899	0.0074285	0.0328391	0.0338459
63	-0.027523	-0.0489132	-0.0511544	-0.0664457	0.000855253	-0.0181331	-0.00846566	0.0126687	0.0110982	0.00120093	0.044412	0.00432027	0.0504056	0.0175519	0.04028	0.0490446
64	-0.0179108	-0.051045	-0.0527771	-0.0648739	3.328e-05	-0.0152121	-0.00744795	0.0151837	0.0241187	0.00989659	0.0542171	0.0154841	0.057562	0.0300746	0.0499339	0.0666436

## Sheet: MN
The data set of averaged HbOs for 20 subjects: Menswear negative display
Data Points	Ch 1	Ch 2	Ch 3	Ch 4	Ch 5	Ch 6	Ch 7	Ch 8	Ch 9	Ch 10	Ch 11	Ch 12	Ch 13	Ch 14	Ch 15	Ch 16
1	0	0	0	0	0	0	0	0	0	0	0	0	0	0	0	0
2	0.00679305	-0.00894783	0.00961461	-0.00696931	0.01076	0.000758499	4.34e-05	-0.00641937	0.00145721	-0.0117402	0.00532428	-0.00648045	0.00812735	-0.0114027	0.00935714	0.0174389
3	0.0160862	-0.0164988	0.0197119	-0.0139477	0.0216453	0.00391575	-0.00149416	-0.0120134	0.00475713	-0.0187865	0.0122904	-0.0101771	0.0189188	-0.0219414	0.0215743	0.0381815
4	0.0266594	-0.0217855	0.0283558	-0.019892	0.0322509	0.00898703	-0.00413826	-0.0158441	0.0090545	-0.0204992	0.0201276	-0.00969216	0.0327358	-0.0284506	0.0350339	0.0610764
5	0.0362977	-0.0250915	0.0334538	-0.0240919	0.042116	0.0148837	-0.00717983	-0.0177206	0.0134538	-0.017809	0.0278824	-0.00462872	0.0488805	-0.0287524	0.0475906	0.084611
6	0.0429111	-0.0272744	0.0337452	-0.0261628	0.0505642	0.0203411	-0.0103889	-0.0182412	0.0173187	-0.0127067	0.0347432	0.00423954	0.065464	-0.022619	0.0575042	0.107156
7	0.0453682	-0.0292005	0.0292327	-0.0261049	0.0566693	0.0244528	-0.0144061	-0.0185642	0.0202683	-0.00746262	0.0399916	0.0151665	0.0797461	-0.0118252	0.0639599	0.127013
8	0.0436502	-0.0315855	0.0207966	-0.0245007	0.0594508	0.0270277	-0.0205438	-0.0201024	0.0219318	-0.00394342	0.0428377	0.0260018	0.0889452	0.000698614	0.0669388	0.142421
9	0.038442	-0.0350953	0.0093722	-0.0226856	0.0582679	0.0285308	-0.030086	-0.0241659	0.0217819	-0.00326143	0.0424673	0.0348396	0.0912215	0.0120343	0.0666275	0.151841
10	0.0305524	-0.0403023	-0.00461143	-0.022571	0.0532156	0.0296642	-0.0434415	-0.0314949	0.0193106	-0.00577239	0.0383799	0.0404168	0.0863679	0.0201803	0.0628652	0.15458
11	0.0206172	-0.0473124	-0.0211311	-0.0259614	0.0452722	0.0308355	-0.0596726	-0.0418093	0.014484	-0.0112741	0.0307351	0.0421377	0.0758084	0.0244104	0.0550779	0.151327
12	0.00928536	-0.0553975	-0.0399842	-0.0336364	0.0360724	0.0319011	-0.0767019	-0.0537116	0.00811156	-0.0191825	0.0204346	0.0399192	0.0619188	0.0251077	0.0427827	0.144125
13	-0.00232859	-0.0631217	-0.0602287	-0.0447901	0.0272943	0.0323718	-0.0921192	-0.0651615	0.00167723	-0.0285905	0.00890737	0.0341075	0.0471584	0.0233736	0.026375	0.135675
14	-0.0124547	-0.0690588	-0.0801377	-0.0572846	0.0199601	0.0319245	-0.104085	-0.0742564	-0.00341088	-0.0383446	-0.00223062	0.0255084	0.0335084	0.0205809	0.00763945	0.128358
15	-0.0190943	-0.0725868	-0.0976618	-0.0686161	0.0140544	0.0308283	-0.11186	-0.0798358	-0.0066368	-0.0472341	-0.0115686	0.0154526	0.0223632	0.0180115	-0.0104328	0.123526
16	-0.0209132	-0.0741916	-0.111101	-0.0769858	0.0087148	0.0299391	-0.11573	-0.081608	-0.00869006	-0.0542716	-0.0182407	0.00570841	0.0145738	0.016595	-0.0245462	0.12135
17	-0.0179864	-0.075088	-0.119611	-0.081858	0.00288066	0.0302211	-0.116566	-0.0800205	-0.0110718	-0.0589807	-0.0221232	-0.00190981	0.0103711	0.0166499	-0.0323265	0.121114
18	-0.0118136	-0.0765423	-0.123379	-0.0837668	-0.00397686	0.0321977	-0.11533	-0.0761076	-0.0152483	-0.0615975	-0.0236596	-0.00606248	0.0093121	0.0177874	-0.0331655	0.121769
19	-0.00460388	-0.079362	-0.123491	-0.0837146	-0.0114106	0.0357817	-0.112734	-0.0713083	-0.0217414	-0.0630126	-0.0233809	-0.0062677	0.0105609	0.0191653	-0.0282479	0.122489
20	0.00171371	-0.0837467	-0.121497	-0.0825558	-0.0180673	0.0405167	-0.109108	-0.0670361	-0.0295876	-0.0643903	-0.0214626	-0.00284573	0.0134706	0.0200233	-0.0198504	0.123046
21	0.00614746	-0.0893065	-0.118841	-0.0806967	-0.022266	0.0459041	-0.104512	-0.0640515	-0.0365178	-0.0665071	-0.0177899	0.00343119	0.017989	0.0201137	-0.0104145	0.123784
22	0.00871603	-0.0950754	-0.11639	-0.0781143	-0.0227974	0.0514713	-0.0990834	-0.0621014	-0.0398751	-0.0691683	-0.0126031	0.0116212	0.0244378	0.0196368	-0.00186713	0.125209
23	0.0100387	-0.0996515	-0.114364	-0.0745862	-0.0195474	0.056685	-0.0934093	-0.0602541	-0.0378766	-0.0711974	-0.00714502	0.0206666	0.0328011	0.0188013	0.00471445	0.127462
24	0.0108245	-0.101627	-0.112676	-0.0699532	-0.0135286	0.0609814	-0.0885243	-0.0577725	-0.0304517	-0.0710646	-0.00360253	0.0293272	0.0421421	0.017491	0.0091865	0.130072
25	0.0115599	-0.100248	-0.111395	-0.0643676	-0.00635484	0.0640333	-0.0853988	-0.0548795	-0.0191465	-0.0677727	-0.00414038	0.0362465	0.0507081	0.0154023	0.0121408	0.132204
26	0.0123944	-0.0958879	-0.111043	-0.0585171	0.000433348	0.0659637	-0.0843106	-0.0528084	-0.00623943	-0.0614711	-0.00971076	0.0401828	0.056698	0.0125117	0.0143358	0.133096
27	0.0131151	-0.0899567	-0.112441	-0.05366	0.00580352	0.067285	-0.0846213	-0.0530352	0.00623703	-0.053413	-0.019424	0.0402892	0.0591957	0.00948717	0.0160798	0.13235
28	0.0132117	-0.0842132	-0.116241	-0.0513156	0.00934735	0.0685676	-0.0851681	-0.0562334	0.0169892	-0.0453282	-0.0308058	0.0363065	0.0586768	0.00768254	0.0170344	0.129904
29	0.012133	-0.0798928	-0.122374	-0.0525383	0.0112193	0.0700507	-0.0848746	-0.0616427	0.0254038	-0.0385506	-0.0406828	0.0286891	0.0566885	0.00861482	0.0166436	0.125867
30	0.00978767	-0.0771653	-0.129819	-0.0571375	0.011992	0.0715009	-0.0831563	-0.0672847	0.0313524	-0.0334166	-0.0461173	0.0186443	0.0549227	0.0131787	0.0148368	0.120483
31	0.00695049	-0.0752701	-0.136863	-0.063437	0.0123526	0.0723291	-0.0799776	-0.0709185	0.0350875	-0.0293503	-0.0451609	0.00796984	0.0542577	0.0210325	0.0123278	0.114181
32	0.00517649	-0.073194	-0.141729	-0.0688955	0.012732	0.0719371	-0.0757105	-0.0711339	0.037225	-0.0255247	-0.0372764	-0.00131404	0.0544874	0.0307077	0.010255	0.107576
33	0.00611997	-0.07049	-0.143219	-0.0713596	0.0130618	0.0700815	-0.0709376	-0.0679584	0.0385485	-0.0216609	-0.0235134	-0.00753525	0.0548468	0.0404115	0.00947427	0.101302
34	0.0106594	-0.0676689	-0.141046	-0.0701213	0.0128685	0.0670119	-0.0662306	-0.0626983	0.0396352	-0.0182965	-0.00636342	-0.00996333	0.0547799	0.0489018	0.0100407	0.0957746
35	0.0184604	-0.0657944	-0.135715	-0.0660927	0.0116924	0.063326	-0.0618839	-0.0571774	0.0405304	-0.0163689	0.0108026	-0.00910831	0.0542529	0.055743	0.0112383	0.0910696
36	0.028193	-0.0655763	-0.128184	-0.0610959	0.00956208	0.059613	-0.0577643	-0.0528498	0.0407258	-0.0165244	0.0247224	-0.00648591	0.0534597	0.0608234	0.0120306	0.0869327
37	0.0380827	-0.0666948	-0.119561	-0.0568404	0.00707628	0.0561984	-0.0534739	-0.0502664	0.0394283	-0.0186967	0.0333105	-0.00390858	0.0523973	0.0637825	0.0116623	0.0829031
38	0.0463946	-0.0679527	-0.110973	-0.0542134	0.0049796	0.0531959	-0.0487652	-0.0491114	0.0359359	-0.022192	0.0362824	-0.00275736	0.0507536	0.0638687	0.0100383	0.078519
39	0.0517543	-0.068022	-0.103428	-0.0530491	0.00351774	0.0508188	-0.0439224	-0.0486538	0.0299798	-0.025997	0.0349739	-0.00366728	0.0481349	0.0603557	0.00763995	0.0735401
40	0.0534102	-0.0661389	-0.0976019	-0.0524549	0.00210331	0.0495623	-0.0397706	-0.0482776	0.0219939	-0.029017	0.0314349	-0.00673495	0.0442932	0.0530533	0.00507996	0.068123
41	0.0514226	-0.062345	-0.0936562	-0.051525	-0.000338488	0.0499416	-0.0372629	-0.0477914	0.013202	-0.0302775	0.0273108	-0.011884	0.0391301	0.0425006	0.0025842	0.062745
42	0.046543	-0.0574135	-0.0912784	-0.0500484	-0.00459033	0.0518223	-0.0369378	-0.0474086	0.00530116	-0.0292916	0.0232047	-0.018916	0.0325948	0.0297267	-0.000161562	0.0578772
43	0.0397318	-0.0527061	-0.0899989	-0.0486935	-0.0105309	0.0538434	-0.0386816	-0.0475152	-0.000227805	-0.0265394	0.0188242	-0.027277	0.024693	0.0158555	-0.00373534	0.0536224
44	0.0316566	-0.049912	-0.0894636	-0.0483933	-0.0171111	0.0535255	-0.0419672	-0.0483992	-0.00286783	-0.0236802	0.0136855	-0.0359323	0.015604	0.00179553	-0.00855164	0.0496076
45	0.0225489	-0.0504987	-0.0894777	-0.0494836	-0.0228626	0.048319	-0.0463593	-0.0500755	-0.00339631	-0.0230807	0.00772261	-0.0436387	0.00575587	-0.0118221	-0.0145996	0.0452383
46	0.0125191	-0.0549697	-0.0898175	-0.0513685	-0.0265006	0.0371005	-0.051789	-0.0522445	-0.0035244	-0.0266847	0.00136297	-0.0494692	-0.00418951	-0.024464	-0.0214405	0.0401855
47	0.00199428	-0.0624603	-0.0899938	-0.0529976	-0.0273299	0.0211359	-0.0583636	-0.0543937	-0.00504737	-0.0349362	-0.00479232	-0.0530863	-0.0133628	-0.0354535	-0.0283622	0.0347683
48	-0.00813124	-0.0711211	-0.0892257	-0.0536458	-0.0253899	0.00375192	-0.0658952	-0.0560324	-0.00899679	-0.046506	-0.0102535	-0.0546223	-0.0206871	-0.0439425	-0.0346266	0.0299324
49	-0.0167079	-0.0790628	-0.0865999	-0.0531906	-0.0213731	-0.0110621	-0.0736412	-0.0569378	-0.0152354	-0.0590032	-0.0146074	-0.0543632	-0.0249997	-0.049193	-0.0397216	0.0267867
50	-0.0227804	-0.0852034	-0.0814732	-0.0517619	-0.0162965	-0.0202536	-0.0805209	-0.0572625	-0.0226037	-0.0701061	-0.0173275	-0.0525353	-0.0254114	-0.051	-0.0434867	0.0260011
51	-0.0259984	-0.0894317	-0.0739568	-0.0493432	-0.011024	-0.022665	-0.0855713	-0.0573692	-0.029448	-0.0783271	-0.0178239	-0.0493515	-0.021806	-0.049893	-0.0459751	0.0274947
52	-0.0268613	-0.0921498	-0.0651967	-0.0458899	-0.00586664	-0.0190393	-0.0882624	-0.057541	-0.0342091	-0.0831032	-0.0158229	-0.0452313	-0.0151331	-0.0469548	-0.047188	0.0305987
53	-0.0266827	-0.0936965	-0.0570449	-0.041802	-0.000550608	-0.0113618	-0.0884413	-0.0578205	-0.0358866	-0.0844683	-0.0117732	-0.0409181	-0.00717655	-0.0433926	-0.0469639	0.0344406
54	-0.027145	-0.0940458	-0.051125	-0.0380956	0.00549823	-0.00189203	-0.0860269	-0.0580172	-0.0341969	-0.0826688	-0.00674627	-0.0372248	0.000265596	-0.0401096	-0.0450732	0.038304
55	-0.0295403	-0.0929017	-0.0479059	-0.0360007	0.0126202	0.00757619	-0.0808703	-0.057864	-0.0295664	-0.0780514	-0.00183422	-0.0345406	0.00634859	-0.0374983	-0.0413584	0.0418157
56	-0.0340035	-0.0899644	-0.0464115	-0.0362842	0.0205101	0.0159245	-0.0729705	-0.0571587	-0.0229831	-0.0711365	0.00256509	-0.0324509	0.0116417	-0.0354296	-0.0357056	0.0450601
57	-0.0392375	-0.0851627	-0.0447804	-0.0388803	0.0281729	0.0224354	-0.0628793	-0.0558431	-0.0157474	-0.0627337	0.00694041	-0.0298989	0.0176657	-0.0333919	-0.0279016	0.0486273
58	-0.0430166	-0.0787442	-0.0412607	-0.0430135	0.0342717	0.0263687	-0.0518672	-0.0540073	-0.00915684	-0.0539376	0.0121175	-0.0258158	0.0257391	-0.0307435	-0.0176538	0.0534486
59	-0.043236	-0.0712053	-0.0350028	-0.047632	0.037732	0.0269202	-0.0415782	-0.0518154	-0.00418623	-0.0459251	0.0183593	-0.0196991	0.0359729	-0.0269416	-0.00486053	0.060339
60	-0.0388975	-0.0631593	-0.0263251	-0.0518541	0.0383345	0.023691	-0.0333408	-0.0493312	-0.00126197	-0.0395821	0.0248696	-0.0116734	0.0471224	-0.021644	0.0100134	0.0694089
61	-0.0304872	-0.0551828	-0.0164577	-0.0552263	0.0369353	0.0172466	-0.027656	-0.0463687	-0.000171692	-0.0351166	0.030111	-0.00215925	0.0573233	-0.0146636	0.0257986	0.0797798
62	-0.0195758	-0.0477478	-0.00697603	-0.0577531	0.0352114	0.00922335	-0.0242131	-0.0425254	-0.000109491	-0.0319219	0.0327313	0.00845617	0.0650817	-0.00596205	0.0408973	0.0899486
63	-0.00796223	-0.04122	0.000874321	-0.0596679	0.0349872	0.00175238	-0.022379	-0.037489	5.05436e-05	-0.0288726	0.0324834	0.0198713	0.0698769	0.00427615	0.0538789	0.0986577
64	0.00311566	-0.0358068	0.00670281	-0.061103	0.0375283	-0.00336135	-0.0217343	-0.0314096	0.00131744	-0.0248759	0.0305228	0.0317562	0.0722716	0.0156032	0.0641775	0.105778

## Sheet: WP
The data set of averaged HbOs for 20 subjects: Womenswaer positive display
Data Points	Ch 1	Ch 2	Ch 3	Ch 4	Ch 5	Ch 6	Ch 7	Ch 8	Ch 9	Ch 10	Ch 11	Ch 12	Ch 13	Ch 14	Ch 15	Ch 16
1	0	0	0	0	0	0	0	0	0	0	0	0	0	0	0	0
2	-0.00379587	-0.00140754	0.00810042	-0.00177159	-0.000301052	0.00565352	0.0033819	-0.00866716	0.000832931	-0.00415341	0.0161935	-0.0044255	0.00788164	0.00567196	0.00729319	0.00226196
3	-0.00823558	-0.00263768	0.0130901	-0.00574621	0.000902363	0.00958081	0.00525848	-0.0181374	-0.000455114	-0.00483208	0.0260252	-0.0151758	0.0156284	0.0121574	0.0120491	0.00576648
4	-0.0135617	-0.00267699	0.0144602	-0.0108472	0.00377224	0.0100908	0.00433665	-0.0264561	-0.00612861	-0.00258985	0.0268781	-0.0325349	0.0212504	0.018191	0.0122421	0.00716379
5	-0.0194177	-0.001286	0.0129176	-0.0156423	0.00785178	0.00688355	0.000312361	-0.0317233	-0.0166313	0.00159938	0.01998	-0.053941	0.0242323	0.0234577	0.00764536	0.00527139
6	-0.0251228	0.000798063	0.00984269	-0.019048	0.0123386	0.00147529	-0.00614996	-0.0327994	-0.0302641	0.00682244	0.00937417	-0.0748351	0.0254621	0.0285725	-0.00015927	0.00103772
7	-0.0300414	0.00244091	0.00640962	-0.0208074	0.0165354	-0.0033721	-0.0138491	-0.0296024	-0.0440885	0.0124954	-0.000631584	-0.0907965	0.0264375	0.0346059	-0.00850673	-0.00343205
8	-0.0338407	0.00289265	0.00301918	-0.021377	0.0201781	-0.00490934	-0.0214985	-0.0229093	-0.055385	0.0182574	-0.00779995	-0.0995407	0.0284512	0.0425322	-0.0146393	-0.00592189
9	-0.036558	0.00217975	-0.000595185	-0.0213782	0.0233902	-0.00176238	-0.0280149	-0.0139537	-0.0626859	0.0237274	-0.0126395	-0.101594	0.0320695	0.0527235	-0.0166729	-0.0048579
10	-0.0384771	0.000970143	-0.00469129	-0.0209995	0.0263219	0.00535111	-0.0326386	-0.00407768	-0.065968	0.0284388	-0.0173066	-0.099477	0.0368921	0.0645065	-0.0143152	0.000179203
11	-0.0398424	0.00023315	-0.00881005	-0.0197393	0.0288148	0.0138695	-0.0350074	0.00550241	-0.0661581	0.0320735	-0.0237454	-0.0961432	0.0414938	0.0759702	-0.00899973	0.00819721
12	-0.0405519	0.000974	-0.0115618	-0.0165951	0.0304086	0.0205849	-0.0351828	0.0139306	-0.064454	0.0347602	-0.0323889	-0.0936346	0.0438456	0.084456	-0.00316493	0.0171577
13	-0.0401205	0.00396068	-0.0111664	-0.0105703	0.0306591	0.0231209	-0.0336209	0.0209482	-0.061811	0.0371496	-0.0419576	-0.0923962	0.0423484	0.0878221	0.00106885	0.0250077
14	-0.0379951	0.00939893	-0.0064964	-0.00130159	0.0294871	0.0209387	-0.0310447	0.0269473	-0.0586443	0.040245	-0.0502315	-0.0914008	0.0369937	0.0857621	0.00296759	0.0307548
15	-0.0339774	0.0167454	0.00202083	0.010461	0.0272373	0.0153586	-0.0282134	0.0326922	-0.0546603	0.04516	-0.0551311	-0.0889595	0.029739	0.0801256	0.00331881	0.034755
16	-0.0283343	0.0249581	0.0123409	0.0228522	0.0245088	0.00874074	-0.0256106	0.0388644	-0.0488687	0.0529015	-0.0554921	-0.0837504	0.0236754	0.0738887	0.00373917	0.0381021
17	-0.0215605	0.0329926	0.0216887	0.0334743	0.0219261	0.00337321	-0.0231809	0.0457662	-0.0399618	0.0640736	-0.0513313	-0.0756004	0.0215137	0.0695055	0.0058216	0.041797
18	-0.0141837	0.040058	0.0279852	0.0404595	0.0200045	0.000669231	-0.0203677	0.0533075	-0.0271616	0.0784081	-0.0436101	-0.0655043	0.0244142	0.0679078	0.010577	0.0463473
19	-0.00685252	0.0454359	0.0309353	0.0434356	0.0191235	0.00100293	-0.0165053	0.0611615	-0.011077	0.0943848	-0.0336815	-0.0549486	0.0317984	0.0687264	0.0182166	0.0518801
20	-0.000513709	0.0482373	0.0320632	0.0436971	0.0195049	0.00397387	-0.0113836	0.0688264	0.00603698	0.109357	-0.0227813	-0.0450922	0.0419932	0.0712406	0.0281299	0.0582832
21	0.00376307	0.0476542	0.0336308	0.0433689	0.0211132	0.00878384	-0.0055672	0.0755446	0.0210372	0.120417	-0.0118831	-0.0364251	0.0531371	0.0751374	0.0390977	0.0651549
22	0.00533582	0.0436442	0.0371341	0.0440835	0.0235376	0.0145741	-0.000213654	0.0803131	0.0312235	0.125591	-0.00195307	-0.0290578	0.0639157	0.0806456	0.0498192	0.0717488
23	0.00445914	0.0373939	0.0424516	0.0461355	0.0260526	0.0207129	0.00355616	0.0822164	0.0354058	0.124642	0.00574443	-0.023212	0.0738756	0.0882071	0.0595696	0.0772197
24	0.00217616	0.0309002	0.0481471	0.0486807	0.0279095	0.0269077	0.00535925	0.0810038	0.0340708	0.118921	0.00981288	-0.019379	0.0831633	0.0979652	0.0684519	0.0810958
25	-0.000246891	0.0259048	0.0525072	0.0506066	0.0287021	0.0330242	0.00586825	0.0774879	0.0288724	0.110505	0.00935928	-0.0180131	0.0918447	0.109303	0.0770449	0.0836011
26	-0.00182994	0.0230285	0.0543775	0.0512273	0.0285254	0.0386716	0.00649384	0.0733211	0.0219739	0.101349	0.00457997	-0.0191483	0.0992281	0.120592	0.0856834	0.0854915
27	-0.00195134	0.0218234	0.0533813	0.0504158	0.0278642	0.0430205	0.0086112	0.0701705	0.0156007	0.0929693	-0.00327764	-0.0223424	0.103856	0.129528	0.0940034	0.0875164
28	-0.000168362	0.0216323	0.0498328	0.0484668	0.0274537	0.0452048	0.0128922	0.0688355	0.0116934	0.086576	-0.0125102	-0.0268839	0.104288	0.134047	0.101053	0.0898872
29	0.00384419	0.0224657	0.0447231	0.0461096	0.0281618	0.0450518	0.0191659	0.0689153	0.0115116	0.0831795	-0.0215738	-0.0319624	0.100112	0.13339	0.105797	0.0920852
30	0.0100274	0.0251055	0.0396243	0.0445189	0.0307412	0.0433744	0.0267727	0.0691866	0.0152644	0.0834024	-0.0293376	-0.0366988	0.0923746	0.128517	0.107567	0.0930875
31	0.0175767	0.0304028	0.0361187	0.0449432	0.0353778	0.0414104	0.0349473	0.0683217	0.0219563	0.0870855	-0.0350811	-0.040271	0.0831431	0.12156	0.106215	0.0918719
32	0.0248408	0.038293	0.0348553	0.0479289	0.0413012	0.0398446	0.0429256	0.0654709	0.0295951	0.0930649	-0.0385146	-0.0422438	0.0745174	0.11466	0.102085	0.0879241
33	0.0296835	0.047353	0.034894	0.0526953	0.046909	0.0383278	0.0498106	0.0604688	0.0357517	0.0993946	-0.0398981	-0.0428954	0.0677837	0.109024	0.0959	0.0814614
34	0.0301989	0.0552298	0.0339929	0.0572665	0.0505354	0.0359907	0.0545606	0.0537553	0.0383302	0.103983	-0.040041	-0.0430864	0.0631828	0.104766	0.0885985	0.0732729
35	0.0254197	0.0596574	0.0297461	0.0593142	0.0513365	0.0323334	0.0561787	0.0460911	0.0362661	0.105326	-0.0400524	-0.0437057	0.0602839	0.101445	0.0810497	0.0642441
36	0.0156149	0.05934	0.0208345	0.0571082	0.0495697	0.0276989	0.0540141	0.0382418	0.0297941	0.102911	-0.0409075	-0.0451169	0.058625	0.0987428	0.0738098	0.0550138
37	0.00198729	0.0541464	0.00762317	0.0499736	0.0461664	0.0229703	0.0480043	0.0307593	0.0201158	0.097112	-0.0430241	-0.0470344	0.0581764	0.0967588	0.0671859	0.0460739
38	-0.0140591	0.0446276	-0.00819055	0.0381222	0.042033	0.0188779	0.0388517	0.0239971	0.0086999	0.0887515	-0.0461338	-0.0488839	0.0593543	0.0958323	0.0617203	0.0383607
39	-0.0315114	0.0314847	-0.0244492	0.0223088	0.0376655	0.0155084	0.0280912	0.0182973	-0.00322658	0.0787545	-0.0494782	-0.0503122	0.062558	0.0960769	0.0586404	0.0337011
40	-0.0496562	0.0155886	-0.0392589	0.00374078	0.0332529	0.012313	0.0179089	0.0141436	-0.0146788	0.0681082	-0.0521392	-0.0514113	0.0675352	0.0970218	0.0596496	0.0344626
41	-0.0674386	-0.00157222	-0.0512625	-0.0158084	0.028972	0.00854067	0.0105493	0.0120762	-0.0245833	0.0580133	-0.0533457	-0.0525805	0.0730775	0.0976074	0.0658778	0.0423009
42	-0.0830428	-0.0177145	-0.0596619	-0.0340943	0.0251639	0.00380838	0.00744786	0.0123617	-0.0316571	0.0498732	-0.0527318	-0.0541943	0.0772948	0.0964933	0.0765887	0.056692
43	-0.094269	-0.0303426	-0.0642438	-0.0489231	0.0222719	-0.00147051	0.0085264	0.0146022	-0.0347784	0.0449533	-0.0505247	-0.0563682	0.0783921	0.092558	0.0887402	0.0744508
44	-0.0994757	-0.0377755	-0.0653256	-0.0587877	0.0206889	-0.00605997	0.0121626	0.0176019	-0.033601	0.0438796	-0.0474965	-0.058929	0.0755324	0.0854373	0.0979917	0.0907879
45	-0.0982926	-0.039845	-0.0634081	-0.063109	0.0205948	-0.00842056	0.0159944	0.019695	-0.0288484	0.0463013	-0.0445221	-0.0614948	0.0692558	0.0758503	0.100752	0.101484
46	-0.0915896	-0.0377434	-0.0586677	-0.0619765	0.0218427	-0.00751639	0.0181524	0.019438	-0.0220213	0.0509248	-0.041899	-0.0635215	0.0612531	0.0655075	0.0960532	0.10489
47	-0.0809054	-0.0332379	-0.0508295	-0.0558238	0.0238932	-0.00347909	0.0180984	0.0162712	-0.0147635	0.0559282	-0.0390848	-0.0644459	0.0535757	0.0564692	0.0860391	0.102473
48	-0.067901	-0.0278677	-0.0397111	-0.0454842	0.0258374	0.0023147	0.0165052	0.0106942	-0.00846032	0.0595009	-0.0351935	-0.0640598	0.0476126	0.0501294	0.074666	0.0975739
49	-0.054155	-0.0225803	-0.0260774	-0.032544	0.0265655	0.00776785	0.0143532	0.0038766	-0.00426107	0.0603034	-0.0299613	-0.062938	0.0433455	0.0464025	0.065428	0.0932086
50	-0.0411815	-0.0178698	-0.0119874	-0.0194583	0.0250307	0.0108377	0.012022	-0.00297998	-0.00326656	0.057788	-0.024215	-0.0623982	0.0393452	0.0437371	0.0595368	0.090364
51	-0.030278	-0.0139916	-0.00016464	-0.00897169	0.02054	0.0101936	0.00907722	-0.00907961	-0.00634163	0.052427	-0.0193884	-0.0637931	0.0336969	0.0401148	0.0557007	0.0878923
52	-0.0221179	-0.0109612	0.00730993	-0.00300539	0.0130284	0.00556398	0.00479555	-0.0140554	-0.0134826	0.0457827	-0.0164926	-0.0675789	0.0253735	0.0344498	0.0514429	0.0838813
53	-0.016296	-0.00828832	0.0101333	-0.00164719	0.00323008	-0.00224529	-0.00110722	-0.017704	-0.0232891	0.040152	-0.0154905	-0.0729681	0.0151777	0.0274501	0.0449775	0.0773758
54	-0.0113523	-0.00495093	0.00995366	-0.00304323	-0.00741064	-0.0116642	-0.00807287	-0.0197101	-0.0332387	0.0376274	-0.0155048	-0.0784972	0.00548971	0.0212591	0.0363572	0.0691465
55	-0.00542535	0.000210032	0.00947024	-0.00430344	-0.0171094	-0.0208178	-0.0148711	-0.0195962	-0.0407859	0.03901	-0.0155078	-0.0829394	-0.00100697	0.0181777	0.0272398	0.061052
56	0.00270615	0.00777373	0.0109794	-0.00298583	-0.0242523	-0.0280104	-0.0201328	-0.0169395	-0.0446344	0.0433487	-0.0148836	-0.0857691	-0.00282606	0.019294	0.0196457	0.0546071
57	0.0129467	0.0173168	0.0152544	0.00177813	-0.0277618	-0.032058	-0.0229165	-0.0117238	-0.0451627	0.0486412	-0.0135946	-0.0869692	-0.000437261	0.0239057	0.0146228	0.0498682
58	0.0240167	0.0276372	0.0213335	0.00905799	-0.0271398	-0.0324355	-0.0229918	-0.00459661	-0.0436996	0.0532038	-0.0120927	-0.0866513	0.00413426	0.030023	0.0117234	0.0454238
59	0.0342244	0.0374008	0.0272697	0.016829	-0.0223379	-0.0292262	-0.0208167	0.00307632	-0.041354	0.0565685	-0.0111454	-0.0850115	0.00855655	0.035555	0.00950932	0.0394596
60	0.0422614	0.0457354	0.031338	0.0231078	-0.0136792	-0.0228708	-0.0173252	0.00946869	-0.0384416	0.0591822	-0.0115124	-0.0825231	0.0115404	0.0394428	0.00666685	0.0311473
61	0.047563	0.0523696	0.032907	0.0268548	-0.00190266	-0.0138934	-0.0136792	0.0128017	-0.0349269	0.0613538	-0.0135335	-0.0799874	0.0134305	0.0420489	0.00286846	0.0213726
62	0.0503436	0.057451	0.0326612	0.0283008	0.011847	-0.00287033	-0.0109945	0.0119364	-0.0312966	0.0624667	-0.0168188	-0.0782278	0.0157506	0.0446372	-0.00113	0.0123316
63	0.0514643	0.061262	0.0320619	0.0285551	0.0261644	0.00929868	-0.0100247	0.00681454	-0.0288918	0.0611844	-0.0203012	-0.0776518	0.0200355	0.0483161	-0.00411733	0.00631669
64	0.052405	0.0643347	0.0328247	0.0290455	0.0395963	0.0210781	-0.0108937	-0.00148609	-0.0292716	0.0563663	-0.0225927	-0.077968	0.0267633	0.0531677	-0.00525854	0.00452028

## Sheet: WN
The data set of averaged HbOs for 20 subjects: Womenswear negative display
Data Points	Ch 1	Ch 2	Ch 3	Ch 4	Ch 5	Ch 6	Ch 7	Ch 8	Ch 9	Ch 10	Ch 11	Ch 12	Ch 13	Ch 14	Ch 15	Ch 16
1	0	0	0	0	0	0	0	0	0	0	0	0	0	0	0	0
2	0.000434225	-0.00995839	0.00245099	-0.00542533	0.00549812	-0.00487858	0.00450299	-0.00929715	0.00145519	-0.00983981	0.00615556	-0.0147341	0.00703362	-0.00723083	-0.00449239	-0.00232884
3	0.00181405	-0.017949	0.00587381	-0.0105829	0.0134381	-0.0118867	0.0130161	-0.0151272	0.00688718	-0.0158927	0.0108539	-0.0262504	0.0207913	-0.00874157	-0.00495355	0.00197317
4	0.00397654	-0.0228958	0.010684	-0.0138667	0.0232506	-0.0194705	0.0232383	-0.0170778	0.0149525	-0.0177824	0.0135205	-0.0320692	0.0395938	-0.00380268	-0.00142748	0.013121
5	0.00664517	-0.0244423	0.0165594	-0.0141141	0.0342295	-0.0256328	0.0326969	-0.0159973	0.0240806	-0.0160694	0.0144223	-0.0310708	0.0609195	0.00732356	0.00511974	0.0294193
6	0.00980915	-0.0228913	0.0224822	-0.011262	0.0453073	-0.0291986	0.0393417	-0.013572	0.0330458	-0.0116707	0.0141831	-0.0240334	0.0821321	0.0231617	0.0131243	0.0478538
7	0.0137566	-0.0191349	0.0273711	-0.00633237	0.0549715	-0.0305926	0.0418003	-0.0116375	0.0411901	-0.00537075	0.0133566	-0.0131093	0.100882	0.0409341	0.0207753	0.0649626
8	0.0187374	-0.0144765	0.0308072	-0.000824797	0.0615668	-0.031652	0.0395626	-0.0114717	0.0483371	0.00245562	0.0122253	-0.000718944	0.115251	0.0570151	0.0263739	0.0778272
9	0.0245833	-0.0102647	0.0331789	0.00399078	0.0638905	-0.0345399	0.0331735	-0.0132996	0.0546571	0.0119398	0.0107617	0.0113351	0.123971	0.0680836	0.0288139	0.0849884
10	0.0306261	-0.00746958	0.035066	0.00741196	0.0616356	-0.0404583	0.0242109	-0.0162065	0.0605446	0.0235484	0.00867397	0.0220382	0.126745	0.0723732	0.0280257	0.0868658
11	0.036131	-0.00637993	0.0364692	0.00930977	0.0555156	-0.0488778	0.0149002	-0.0184834	0.066502	0.037585	0.00562797	0.0308036	0.124483	0.0703212	0.0251422	0.0854379
12	0.0409764	-0.00653755	0.0367386	0.0100462	0.0471299	-0.0577831	0.00745218	-0.0182652	0.0729209	0.0536693	0.00157575	0.037173	0.119122	0.0642203	0.02211	0.083249
13	0.0459502	-0.00696879	0.0353387	0.0104167	0.0386588	-0.0647155	0.0033993	-0.0142507	0.0797609	0.0705492	-0.00305185	0.0409406	0.11306	0.0572361	0.0208777	0.0824437
14	0.0522256	-0.00662726	0.032777	0.0114987	0.0323427	-0.0678978	0.00317206	-0.00625654	0.0864123	0.0864574	-0.00739093	0.0426019	0.108457	0.0523816	0.0225342	0.0842165
15	0.0603109	-0.00487332	0.0307823	0.014266	0.0298136	-0.0667413	0.00607217	0.00463036	0.0918848	0.0997035	-0.010325	0.0435756	0.106756	0.0518321	0.0268871	0.0888076
16	0.0693044	-0.00178661	0.0314936	0.019132	0.0315689	-0.0616623	0.01067	0.0163972	0.0952861	0.109103	-0.0106633	0.0458122	0.108529	0.0565579	0.0326926	0.0957639
17	0.0772575	0.00197917	0.0363254	0.0258302	0.0369628	-0.0535889	0.0154919	0.0268287	0.0962597	0.114116	-0.00735249	0.0508856	0.113508	0.0661459	0.0383665	0.104172
18	0.0823861	0.0056838	0.0452708	0.0337122	0.0446469	-0.0436307	0.0196167	0.0342866	0.0951047	0.114783	8.78975e-05	0.0591003	0.120737	0.0788549	0.0427368	0.112765
19	0.0841877	0.00902468	0.057032	0.0422252	0.0530721	-0.0329461	0.0228556	0.0381863	0.0925705	0.111654	0.0110928	0.0692109	0.128823	0.0920566	0.0454484	0.120041
20	0.0835511	0.0122136	0.069651	0.0510674	0.0607577	-0.0225888	0.0255264	0.0390823	0.089521	0.105683	0.0239731	0.0789431	0.136245	0.103032	0.0468659	0.124555
21	0.0819022	0.015535	0.0812133	0.0599135	0.0663109	-0.0133212	0.027988	0.0383067	0.0866814	0.0980582	0.0364774	0.0860161	0.141661	0.109856	0.0476234	0.125393
22	0.08021	0.0188202	0.0903081	0.0680265	0.0685063	-0.00561206	0.0302549	0.0373271	0.0846035	0.0899799	0.0466633	0.0890918	0.144033	0.111853	0.0480965	0.122602
23	0.0786266	0.0213492	0.0961699	0.0742119	0.0666121	9.18822e-05	0.0318463	0.0370489	0.0837632	0.0824765	0.0534679	0.0881244	0.142699	0.109448	0.0481226	0.117243
24	0.0768528	0.0223437	0.0985213	0.0772223	0.0608276	0.00310649	0.0319634	0.0373875	0.0846436	0.076283	0.0566906	0.0840323	0.137462	0.103569	0.0471017	0.110904
25	0.0747527	0.0216482	0.0973293	0.0763383	0.0524973	0.00274522	0.0299552	0.0373783	0.0876491	0.0717824	0.0567411	0.0780658	0.128823	0.0951681	0.044446	0.104969
26	0.0726721	0.0200248	0.0927433	0.0717848	0.0438349	-0.00101357	0.0258233	0.0358338	0.0928518	0.0689297	0.0544714	0.0713718	0.118126	0.0851954	0.0400366	0.100135
27	0.0713068	0.0187538	0.0853107	0.0647322	0.0371384	-0.00706183	0.0203526	0.0321395	0.0996462	0.0672201	0.0510118	0.0648767	0.107344	0.074855	0.0343431	0.096467
28	0.0712183	0.0187531	0.076082	0.0568057	0.0339181	-0.013421	0.0148014	0.0267422	0.10658	0.0658093	0.0472924	0.0592554	0.098503	0.0657296	0.0281581	0.0938436
29	0.0723224	0.0198345	0.0662173	0.0492554	0.0343665	-0.0181314	0.0103903	0.0210174	0.111674	0.063866	0.043403	0.0547674	0.0929909	0.0594034	0.022208	0.0922892
30	0.0736469	0.0207116	0.0563178	0.0423716	0.037547	-0.0199653	0.00801016	0.0166767	0.113189	0.0609768	0.0384538	0.0511159	0.0911739	0.0568182	0.0169674	0.0918847
31	0.0736273	0.0198487	0.0462085	0.0356829	0.0421728	-0.0184646	0.00825155	0.0151517	0.1105	0.0573367	0.0313495	0.0476174	0.092504	0.0578715	0.0127329	0.0923789
32	0.0708483	0.0165184	0.0355371	0.0288617	0.0473744	-0.0135453	0.0114899	0.0172683	0.104503	0.0535805	0.0219927	0.0437611	0.0959365	0.0615461	0.00976955	0.0930028
33	0.0648532	0.0113109	0.0247137	0.0225679	0.0529387	-0.00527154	0.0178027	0.0232026	0.0972818	0.0504221	0.0119443	0.0398306	0.100338	0.0664374	0.00835535	0.0928673
34	0.0564334	0.00571629	0.0151955	0.0183289	0.0588348	0.00582056	0.0267134	0.0324799	0.0911391	0.0483972	0.00390858	0.0370211	0.10463	0.0711725	0.00867601	0.0916611
35	0.0472301	0.00120988	0.00873895	0.0174756	0.064545	0.0182636	0.0369952	0.0438913	0.0875698	0.0477717	0.000364807	0.0368067	0.107818	0.0745521	0.0107344	0.0900913
36	0.0388729	-0.00149199	0.00619634	0.020012	0.0688784	0.0297083	0.0467683	0.0555341	0.0867829	0.0485063	0.00223898	0.0399389	0.109142	0.0756103	0.0142863	0.0895424
37	0.0322514	-0.00262432	0.00687391	0.0244395	0.070544	0.0376833	0.0538909	0.0651332	0.087925	0.0501747	0.00842408	0.0458383	0.108321	0.0737838	0.0187376	0.0911343
38	0.0272764	-0.00311965	0.00890129	0.0286142	0.0689826	0.0404877	0.0565132	0.0706363	0.0897683	0.051967	0.0163974	0.052928	0.105664	0.0691108	0.0229963	0.0947928
39	0.0232178	-0.00410924	0.0103082	0.0308803	0.0647305	0.0376087	0.0536514	0.0708765	0.0912909	0.0529537	0.0234902	0.0595367	0.101864	0.0622122	0.0255328	0.0990363
40	0.0192965	-0.00646508	0.0100788	0.0306448	0.0589462	0.0294651	0.0455767	0.0659728	0.0918193	0.0524769	0.028075	0.0646566	0.0976063	0.0539739	0.0248796	0.101658
41	0.0152085	-0.0105205	0.00864243	0.0282211	0.0525894	0.0169821	0.0338789	0.0573337	0.0908226	0.0503956	0.030014	0.0680076	0.0932293	0.0451893	0.0204957	0.10095
42	0.0113517	-0.0160512	0.00752125	0.0242893	0.0460216	0.0014689	0.0210322	0.0471747	0.0878092	0.0470346	0.0302052	0.0695892	0.0887043	0.0364608	0.0134134	0.0966735
43	0.00865273	-0.0224535	0.00830723	0.0194578	0.0392812	-0.0152532	0.00955036	0.037707	0.0825266	0.0429617	0.0295391	0.0691738	0.083835	0.0283562	0.00605552	0.090284
44	0.00805849	-0.028946	0.0115075	0.014113	0.0326729	-0.030856	0.00113738	0.0303587	0.0752606	0.0388166	0.0280472	0.0662	0.0785095	0.0215617	0.00111333	0.084236
45	0.00996369	-0.0346703	0.0160991	0.00856935	0.0270331	-0.0429258	-0.00375992	0.025368	0.0668475	0.0352713	0.0249293	0.0601711	0.0728681	0.0167922	4.45956e-05	0.0807076
46	0.0139706	-0.038716	0.0201652	0.00331793	0.0234674	-0.0496268	-0.00574486	0.0219715	0.0583799	0.0329977	0.0195074	0.0513222	0.0673512	0.014556	0.00226194	0.0805323
47	0.0192287	-0.040135	0.0222782	-0.000808445	0.0228791	-0.0501829	-0.00579699	0.0190429	0.0508744	0.032482	0.0123246	0.0410565	0.0627314	0.0150939	0.00562289	0.0830158
48	0.0251521	-0.0380324	0.0225771	-0.00273945	0.0256256	-0.0451217	-0.00455321	0.015863	0.0451667	0.0338317	0.00534696	0.0316817	0.0600191	0.0184976	0.00792372	0.0867744
49	0.0318778	-0.0317989	0.022715	-0.00158703	0.031455	-0.036216	-0.00197701	0.0126134	0.0418677	0.0367705	0.000966302	0.0253617	0.0600917	0.0246797	0.00828498	0.0908448
50	0.0399777	-0.021499	0.0246391	0.00278173	0.039592	-0.0260649	0.00248753	0.0103871	0.0411716	0.0409036	0.000443355	0.022888	0.0630904	0.0329428	0.00749745	0.0952096
51	0.0496818	-0.00815344	0.0291971	0.00944811	0.0488692	-0.0172175	0.00937516	0.0106084	0.0425007	0.0459695	0.00293632	0.0230909	0.0680209	0.0414917	0.00728881	0.100397
52	0.0602799	0.00637263	0.0355758	0.016687	0.0580151	-0.0110609	0.0186494	0.0141334	0.044379	0.0517464	0.00574312	0.0233205	0.0731224	0.0477278	0.00920953	0.106679
53	0.0703175	0.0200324	0.0420247	0.0226943	0.0660669	-0.0071925	0.0294096	0.020465	0.0448811	0.0576594	0.00563154	0.0207956	0.0768632	0.0494527	0.0137924	0.113509
54	0.078391	0.0314507	0.0472012	0.0263284	0.072682	-0.00384794	0.0400053	0.0276132	0.0425084	0.062485	0.000485166	0.0140597	0.078866	0.0462265	0.0202735	0.11959
55	0.0838492	0.0403509	0.0510574	0.0273833	0.0780593	0.000784837	0.0484623	0.0327969	0.0369119	0.0645698	-0.00957428	0.00375152	0.0800091	0.0397366	0.0268472	0.123377
56	0.0868821	0.0472259	0.0545447	0.0263069	0.0823821	0.00717821	0.0529721	0.0336142	0.0290018	0.062456	-0.0221935	-0.00775717	0.0816655	0.0328017	0.0313743	0.123673
57	0.088056	0.0525267	0.0584455	0.0236364	0.0852704	0.0139856	0.0523352	0.0290233	0.0204106	0.0554974	-0.0338548	-0.0176143	0.0847338	0.0277898	0.03229	0.120024
58	0.0878192	0.0560183	0.0623243	0.0195981	0.0857533	0.0187636	0.046321	0.0196079	0.0127545	0.0440589	-0.0413837	-0.0238684	0.0892004	0.0256125	0.0292631	0.112762
59	0.0863597	0.0567903	0.0645256	0.014141	0.0829359	0.0193756	0.0359035	0.00711687	0.00709178	0.0292853	-0.0430783	-0.0261323	0.094396	0.0258213	0.0231935	0.102755
60	0.0837804	0.0538646	0.0632249	0.00729948	0.0768373	0.0151993	0.0232068	-0.00629696	0.0037643	0.0127446	-0.0390275	-0.0253266	0.0996331	0.0274233	0.015621	0.0910887
61	0.0802602	0.0469196	0.0577307	-0.000399017	0.0687048	0.00747963	0.0109402	-0.0187576	0.00250208	-0.00379925	-0.0307597	-0.0228888	0.104711	0.0296552	0.00794812	0.0789017
62	0.0759765	0.0366206	0.0489582	-0.00789591	0.0604369	-0.00129573	0.00143759	-0.029067	0.00266541	-0.0184796	-0.0206389	-0.0200739	0.109956	0.0322539	0.000922769	0.0673235
63	0.070859	0.024389	0.0387359	-0.0140415	0.0535271	-0.00858474	-0.00416244	-0.0367316	0.00351189	-0.0294386	-0.0112476	-0.0176394	0.115812	0.0353126	-0.00538045	0.0573846
64	0.0644817	0.0118421	0.0285792	-0.0181779	0.0482523	-0.0128857	-0.00612701	-0.0417719	0.00440862	-0.0351132	-0.00474964	-0.0157968	0.122275	0.0389995	-0.0112813	0.0496976

## Sheet: UP
The data set of averaged HbOs for 20 subjects: Underwear positive display
Data Points	Ch 1	Ch 2	Ch 3	Ch 4	Ch 5	Ch 6	Ch 7	Ch 8	Ch 9	Ch 10	Ch 11	Ch 12	Ch 13	Ch 14	Ch 15	Ch 16
1	0	0	0	0	0	0	0	0	0	0	0	0	0	0	0	0
2	-0.00206952	0.00357313	-0.00236404	-0.00976666	0.00179411	-0.00996443	-0.000251622	-0.00429406	-0.00689424	-0.00759313	0.00345915	-0.0120579	-0.00463159	-0.00989289	-0.00849525	0.000241207
3	-0.005805	0.00270573	-0.00476368	-0.0221725	0.0068559	-0.0213268	0.000929507	-0.00703825	-0.0129389	-0.0120714	0.00753941	-0.0250214	-0.00740414	-0.0196821	-0.0161945	0.0029123
4	-0.0111484	-0.0016292	-0.00719904	-0.0362018	0.0130606	-0.0334775	0.00216121	-0.00672642	-0.0164894	-0.0130649	0.0113785	-0.0368531	-0.00948312	-0.0283484	-0.0243113	0.00765789
5	-0.0179735	-0.00842278	-0.0102698	-0.0508814	0.0173828	-0.0462146	0.00153682	-0.00339327	-0.0170801	-0.011498	0.0136918	-0.0460672	-0.0124125	-0.0353392	-0.0340711	0.0135072
6	-0.0262708	-0.0171171	-0.015113	-0.0656843	0.016984	-0.0597759	-0.00260195	0.0011298	-0.0157532	-0.00905643	0.0134112	-0.0522272	-0.0174512	-0.0409387	-0.0462055	0.0191724
7	-0.0363613	-0.0276687	-0.0231172	-0.0806251	0.010188	-0.0746933	-0.0112471	0.00381457	-0.0146015	-0.00752895	0.0102395	-0.0561055	-0.0250914	-0.0460456	-0.0607543	0.0234043
8	-0.0488718	-0.040192	-0.0353625	-0.0959306	-0.00310782	-0.0915519	-0.0246955	0.00171824	-0.0157053	-0.00824755	0.00483417	-0.0592427	-0.0349072	-0.0514619	-0.0771003	0.0253364
9	-0.0644414	-0.0545099	-0.0520104	-0.111561	-0.021716	-0.110706	-0.0426269	-0.00663569	-0.0200457	-0.0117024	-0.00147739	-0.0630584	-0.0458303	-0.0573332	-0.0940979	0.0247772
10	-0.0833507	-0.0700323	-0.0720516	-0.127009	-0.0438247	-0.131945	-0.0640061	-0.0204539	-0.0270007	-0.0174228	-0.00722991	-0.0680464	-0.0567361	-0.0631889	-0.110353	0.0223685
11	-0.105313	-0.0860857	-0.0936261	-0.141514	-0.0675775	-0.154278	-0.0870391	-0.0369668	-0.0347464	-0.0242164	-0.0112949	-0.0735698	-0.0668852	-0.068401	-0.124617	0.0194857
12	-0.129491	-0.102373	-0.114788	-0.154548	-0.0913329	-0.176048	-0.109537	-0.0527431	-0.0412681	-0.0307785	-0.0132054	-0.0784104	-0.075939	-0.0725715	-0.136099	0.0177543
13	-0.154592	-0.119012	-0.134199	-0.166128	-0.113594	-0.195362	-0.129706	-0.0652668	-0.0452889	-0.03629	-0.0133214	-0.0816574	-0.0836493	-0.0755825	-0.144564	0.0183228
14	-0.178964	-0.136031	-0.151344	-0.176772	-0.132917	-0.210714	-0.146863	-0.0738297	-0.0465483	-0.0406337	-0.0128276	-0.083332	-0.0896689	-0.0774767	-0.150261	0.0212547
15	-0.200752	-0.152761	-0.1663	-0.187149	-0.148037	-0.221456	-0.161521	-0.0792742	-0.0454429	-0.0440936	-0.0134596	-0.0843184	-0.0936561	-0.0784122	-0.153793	0.0254887
16	-0.218211	-0.167685	-0.179322	-0.197626	-0.158285	-0.22792	-0.174749	-0.0829722	-0.0425389	-0.0468152	-0.0168618	-0.085685	-0.0954806	-0.0786295	-0.155923	0.0295045
17	-0.230154	-0.179065	-0.190633	-0.207992	-0.164001	-0.23114	-0.187321	-0.0859432	-0.0383912	-0.048464	-0.0238535	-0.0879668	-0.0952598	-0.0782886	-0.157269	0.0323201
18	-0.236397	-0.185937	-0.200473	-0.217506	-0.166569	-0.232369	-0.199209	-0.0886645	-0.0336866	-0.0483143	-0.034028	-0.0909545	-0.0933342	-0.0772742	-0.158024	0.0340625
19	-0.237942	-0.188781	-0.209207	-0.22522	-0.16788	-0.232602	-0.209686	-0.0914557	-0.0293544	-0.045711	-0.0459077	-0.0941258	-0.0903676	-0.0753208	-0.157948	0.0356904
20	-0.236719	-0.189399	-0.217305	-0.23043	-0.169504	-0.232371	-0.21786	-0.0948289	-0.0264045	-0.040635	-0.0575089	-0.09731	-0.0874723	-0.0724787	-0.15667	0.0380822
21	-0.234807	-0.190043	-0.225115	-0.233054	-0.172102	-0.231866	-0.223164	-0.0993537	-0.0254214	-0.0339298	-0.0669121	-0.100938	-0.086043	-0.0695334	-0.154001	0.0412609
22	-0.233449	-0.192353	-0.2326	-0.233719	-0.17545	-0.231222	-0.22547	-0.105166	-0.0259704	-0.0269449	-0.0726141	-0.105643	-0.0872417	-0.0678548	-0.150038	0.0442556
23	-0.232538	-0.196821	-0.239284	-0.233575	-0.178952	-0.230689	-0.224872	-0.11161	-0.0264179	-0.0208203	-0.0736951	-0.111544	-0.0914404	-0.0686405	-0.145017	0.0455979
24	-0.231007	-0.202978	-0.244522	-0.233843	-0.182226	-0.230562	-0.22152	-0.117386	-0.0245401	-0.0159521	-0.0699938	-0.11791	-0.0980243	-0.072113	-0.139207	0.0440017
25	-0.227896	-0.209965	-0.247903	-0.235348	-0.185307	-0.230932	-0.215849	-0.121175	-0.0187833	-0.012018	-0.062232	-0.123475	-0.10567	-0.0772668	-0.132967	0.0389318
26	-0.223212	-0.216942	-0.249436	-0.238177	-0.188425	-0.23156	-0.208913	-0.122254	-0.00938581	-0.00846907	-0.0519694	-0.127103	-0.112856	-0.0822905	-0.12688	0.0309068
27	-0.217884	-0.223085	-0.249419	-0.241681	-0.191571	-0.231997	-0.202319	-0.120744	0.00151898	-0.00498624	-0.0412013	-0.128162	-0.118301	-0.0853185	-0.121683	0.0214332
28	-0.212899	-0.22738	-0.248165	-0.244711	-0.194161	-0.231835	-0.197523	-0.11735	0.0109649	-0.00153094	-0.031713	-0.12638	-0.121211	-0.0850731	-0.117888	0.0125059
29	-0.208469	-0.228663	-0.245907	-0.245992	-0.19501	-0.230811	-0.195005	-0.112858	0.0166502	0.00193471	-0.024508	-0.121634	-0.121344	-0.0812033	-0.115292	0.00583304
30	-0.203908	-0.226021	-0.242835	-0.244417	-0.192683	-0.228655	-0.194038	-0.107752	0.0178819	0.00567777	-0.0195731	-0.114027	-0.118945	-0.0742983	-0.112821	0.00221663
31	-0.198187	-0.219272	-0.23905	-0.239207	-0.186096	-0.224888	-0.193223	-0.102106	0.0155498	0.0101217	-0.0160503	-0.104096	-0.114568	-0.0656059	-0.108982	0.00149138
32	-0.190566	-0.209136	-0.23439	-0.23001	-0.17506	-0.218839	-0.191262	-0.0957392	0.0114352	0.0155064	-0.0126803	-0.0926772	-0.108782	-0.0564524	-0.102735	0.00298238
33	-0.180822	-0.196908	-0.228387	-0.217043	-0.160504	-0.210034	-0.187443	-0.0884804	0.00740442	0.0216015	-0.00840339	-0.0804622	-0.101922	-0.047639	-0.0942049	0.00602681
34	-0.169098	-0.18387	-0.220593	-0.201264	-0.144271	-0.198667	-0.18167	-0.080386	0.00487155	0.0276679	-0.0029426	-0.0677781	-0.0941148	-0.0392092	-0.0846961	0.0101484
35	-0.155716	-0.170836	-0.211031	-0.184344	-0.128553	-0.185777	-0.17425	-0.0718782	0.00456793	0.0327132	0.002976	-0.0549149	-0.0855593	-0.0308052	-0.0760094	0.0149182
36	-0.141175	-0.158056	-0.20037	-0.1683	-0.115211	-0.172993	-0.165714	-0.0637378	0.00654872	0.0358444	0.00796898	-0.0426778	-0.0768244	-0.0223406	-0.0695583	0.0197612
37	-0.126231	-0.145451	-0.189647	-0.154864	-0.105229	-0.16198	-0.156726	-0.056923	0.0103803	0.0366293	0.0108371	-0.0324744	-0.0687994	-0.0143931	-0.0658394	0.0240383
38	-0.111861	-0.13293	-0.179787	-0.144938	-0.0986046	-0.153969	-0.148019	-0.0522201	0.0153682	0.0353396	0.0112945	-0.0257738	-0.0623122	-0.0080284	-0.0645285	0.027264
39	-0.0990178	-0.12063	-0.171278	-0.138435	-0.0947391	-0.149509	-0.140278	-0.0499034	0.0207042	0.0329566	0.010037	-0.0233706	-0.057715	-0.00426269	-0.0649758	0.0292236
40	-0.0883608	-0.108992	-0.164112	-0.134533	-0.0930427	-0.148469	-0.133925	-0.0495963	0.0254721	0.0307927	0.00810589	-0.0250505	-0.0548255	-0.00362392	-0.0667379	0.0298056
41	-0.0801676	-0.0986999	-0.157909	-0.132169	-0.0932747	-0.150172	-0.12894	-0.0504806	0.0286158	0.0297802	0.00605946	-0.0298515	-0.0532814	-0.00612649	-0.069841	0.0286746
42	-0.0744384	-0.090572	-0.152169	-0.130532	-0.0953557	-0.153604	-0.124931	-0.0517172	0.0290557	0.0298875	0.00361971	-0.0366113	-0.0529515	-0.0115005	-0.0746487	0.0251826
43	-0.071025	-0.0854108	-0.146582	-0.12942	-0.0989191	-0.157661	-0.121481	-0.0527918	0.0260121	0.030115	-8.79188e-07	-0.0444248	-0.0540311	-0.0194204	-0.0814503	0.0187117
44	-0.0696748	-0.0838301	-0.141255	-0.129254	-0.103096	-0.161404	-0.118537	-0.053592	0.0194197	0.0290811	-0.00541035	-0.0527989	-0.0567417	-0.0295485	-0.0900224	0.00923271
45	-0.0700338	-0.0860917	-0.136714	-0.130679	-0.106789	-0.164237	-0.11647	-0.0542559	0.0101867	0.0257591	-0.0125347	-0.0614973	-0.0609249	-0.0414114	-0.0994198	-0.0023341
46	-0.0717412	-0.0919442	-0.133609	-0.133906	-0.109211	-0.165933	-0.11573	-0.0550363	-1.48501e-05	0.0198434	-0.0206007	-0.0702685	-0.0659237	-0.0542482	-0.108217	-0.0142597
47	-0.0746824	-0.100555	-0.132382	-0.138285	-0.110222	-0.166544	-0.116386	-0.0563032	-0.00947511	0.0116231	-0.0285795	-0.0787006	-0.0708315	-0.0669462	-0.115015	-0.0245587
48	-0.0791222	-0.110547	-0.133078	-0.142486	-0.110249	-0.166287	-0.117949	-0.0585514	-0.0172897	0.0016195	-0.0357726	-0.0863521	-0.0748997	-0.0781961	-0.11897	-0.0316999
49	-0.0855258	-0.120144	-0.135309	-0.145148	-0.109792	-0.16541	-0.119559	-0.0622084	-0.0236249	-0.00964905	-0.042032	-0.0929798	-0.0777715	-0.0868738	-0.120046	-0.0351299
50	-0.0940268	-0.12745	-0.138216	-0.145433	-0.108874	-0.163971	-0.120299	-0.0672632	-0.0291473	-0.0216526	-0.0474694	-0.098614	-0.0794373	-0.092478	-0.118966	-0.0353828
51	-0.103976	-0.130959	-0.140532	-0.143175	-0.106819	-0.161635	-0.119468	-0.0730327	-0.0341235	-0.0337319	-0.0519434	-0.103439	-0.0800473	-0.0953689	-0.116973	-0.0337021
52	-0.113942	-0.130134	-0.14088	-0.138685	-0.102587	-0.157719	-0.116741	-0.0783063	-0.0380465	-0.0450504	-0.0548248	-0.107579	-0.0797948	-0.0966296	-0.115461	-0.0313791
53	-0.122204	-0.125734	-0.1384	-0.132582	-0.0955287	-0.15166	-0.112242	-0.081829	-0.0400595	-0.0546602	-0.055287	-0.110995	-0.0789149	-0.0975938	-0.115492	-0.0291964
54	-0.127466	-0.119549	-0.133363	-0.125824	-0.0860771	-0.143704	-0.106535	-0.0828691	-0.0397326	-0.0616835	-0.0528647	-0.113506	-0.0777172	-0.0992802	-0.117318	-0.027342
55	-0.129354	-0.11363	-0.127269	-0.119744	-0.0758421	-0.135257	-0.10053	-0.0815502	-0.0374325	-0.0655164	-0.0478391	-0.11488	-0.0765635	-0.102013	-0.120235	-0.0257704
56	-0.128519	-0.109518	-0.122238	-0.115907	-0.0669982	-0.12846	-0.0953049	-0.0787734	-0.0341091	-0.0659888	-0.0411769	-0.114918	-0.0757267	-0.10531	-0.122928	-0.024571
57	-0.126362	-0.107963	-0.12005	-0.115711	-0.0614163	-0.125172	-0.0918615	-0.0757928	-0.0308137	-0.0633995	-0.0341205	-0.113565	-0.0752019	-0.108049	-0.124209	-0.0239737
58	-0.124444	-0.109068	-0.1214	-0.119884	-0.0599906	-0.12604	-0.090781	-0.0736021	-0.0283145	-0.0584012	-0.0277414	-0.111062	-0.0745663	-0.108839	-0.123596	-0.024005
59	-0.123877	-0.112505	-0.125764	-0.128132	-0.0624558	-0.130282	-0.0919181	-0.0725258	-0.0269748	-0.0518554	-0.0227166	-0.108076	-0.0730542	-0.106564	-0.121411	-0.024205
60	-0.12505	-0.117625	-0.131828	-0.139197	-0.0676544	-0.136234	-0.0944211	-0.072261	-0.0269007	-0.0448028	-0.0194327	-0.105679	-0.0699172	-0.100936	-0.118442	-0.0237131
61	-0.127817	-0.123562	-0.138095	-0.151295	-0.0740715	-0.142181	-0.0971329	-0.0722998	-0.0281352	-0.0384359	-0.0181606	-0.104996	-0.0649019	-0.0926893	-0.115535	-0.021588
62	-0.131929	-0.129447	-0.143301	-0.162711	-0.0803885	-0.146982	-0.0991363	-0.0723478	-0.0306796	-0.0339109	-0.0190148	-0.106597	-0.0585617	-0.0833116	-0.113432	-0.0171389
63	-0.137235	-0.13462	-0.146576	-0.172237	-0.0857929	-0.15023	-0.0999868	-0.0723804	-0.0342002	-0.0318685	-0.0216024	-0.109954	-0.0521118	-0.0744337	-0.112782	-0.0101034
64	-0.143466	-0.138662	-0.147455	-0.17931	-0.0899299	-0.152065	-0.0995058	-0.0723603	-0.0376934	-0.0319331	-0.0247038	-0.113435	-0.0468613	-0.0672348	-0.11401	-0.000659288

## Sheet: UN
The data set of averaged HbOs for 20 subjects: Underwear negative display
Data Points	Ch 1	Ch 2	Ch 3	Ch 4	Ch 5	Ch 6	Ch 7	Ch 8	Ch 9	Ch 10	Ch 11	Ch 12	Ch 13	Ch 14	Ch 15	Ch 16
1	0	0	0	0	0	0	0	0	0	0	0	0	0	0	0	0
2	0.00564696	-0.010575	0.00100173	-0.0169133	0.000949925	-0.00484486	-0.00522283	-0.0118654	0.00282544	-0.00929194	0.00546423	-0.00963769	0.00484164	-0.0167257	-0.00884965	0.0018011
3	0.0116664	-0.0221747	0.000853903	-0.0347052	0.00346861	-0.00661521	-0.00971003	-0.0207295	0.00618333	-0.0186088	0.0125689	-0.0163863	0.00946655	-0.0346601	-0.0192189	0.00580762
4	0.0164877	-0.0340358	-0.00235688	-0.0516366	0.0053899	-0.00679045	-0.0142921	-0.0252456	0.00960843	-0.026417	0.0201229	-0.0203457	0.0126584	-0.0512009	-0.0305319	0.011738
5	0.0181498	-0.0464297	-0.0104897	-0.0667922	0.00450014	-0.00782449	-0.020076	-0.0257558	0.0116854	-0.0321292	0.0263725	-0.0226035	0.0133254	-0.064196	-0.0422334	0.0189465
6	0.015095	-0.0601062	-0.0244583	-0.080028	-0.000704665	-0.0121972	-0.0280744	-0.023987	0.0103022	-0.036317	0.0293841	-0.024714	0.0106954	-0.0725777	-0.0541704	0.0266019
7	0.0067591	-0.075395	-0.0436926	-0.0915553	-0.0106417	-0.0215689	-0.038812	-0.022166	0.00358154	-0.040255	0.0274745	-0.0279161	0.00426375	-0.0767282	-0.0667674	0.0339083
8	-0.00637417	-0.0917097	-0.0662827	-0.101608	-0.0246188	-0.0362182	-0.0522098	-0.0221727	-0.0090735	-0.0451882	0.0196055	-0.0325977	-0.00622926	-0.0782643	-0.0807474	0.0404163
9	-0.0232163	-0.107823	-0.0898373	-0.110531	-0.0410779	-0.0549888	-0.0678135	-0.0251531	-0.0265847	-0.0518078	0.00569371	-0.0384145	-0.020603	-0.0792539	-0.0964291	0.0462913
10	-0.0425666	-0.122512	-0.11247	-0.118992	-0.0580244	-0.0757794	-0.0850655	-0.0314427	-0.0466468	-0.0600662	-0.0132276	-0.0448529	-0.0379702	-0.0812196	-0.113067	0.0522648
11	-0.0633065	-0.134983	-0.133308	-0.127888	-0.0735606	-0.0963776	-0.10341	-0.0405678	-0.0666035	-0.0691875	-0.0350938	-0.0516857	-0.0567011	-0.0844716	-0.128799	0.0591729
12	-0.0842866	-0.144923	-0.152306	-0.137822	-0.0864337	-0.115186	-0.122186	-0.0512436	-0.0842773	-0.077783	-0.0572018	-0.0589518	-0.0748514	-0.0881961	-0.141466	0.0672385
13	-0.104187	-0.152351	-0.169699	-0.148613	-0.0963767	-0.131402	-0.14047	-0.0615134	-0.098446	-0.0841433	-0.0768336	-0.0665744	-0.0907997	-0.0911384	-0.149781	0.075698
14	-0.121618	-0.157521	-0.185551	-0.159274	-0.104077	-0.144603	-0.157056	-0.0692038	-0.108876	-0.086779	-0.0919384	-0.0740978	-0.103746	-0.0924522	-0.154056	0.0830942
15	-0.135472	-0.16086	-0.199653	-0.168504	-0.110803	-0.154221	-0.170717	-0.0726415	-0.115978	-0.085028	-0.101625	-0.0807834	-0.113758	-0.0921886	-0.155977	0.0880992
16	-0.145313	-0.162866	-0.21166	-0.175254	-0.117831	-0.15948	-0.180599	-0.0712635	-0.120334	-0.0793332	-0.106305	-0.0859559	-0.121427	-0.091264	-0.157642	0.0902778
17	-0.15152	-0.163957	-0.221176	-0.178929	-0.125938	-0.159902	-0.186607	-0.065753	-0.122326	-0.0709434	-0.107389	-0.0892252	-0.127395	-0.0909665	-0.160523	0.0902677
18	-0.15511	-0.164383	-0.227714	-0.179242	-0.135098	-0.155899	-0.189433	-0.0575391	-0.122027	-0.0612259	-0.106638	-0.0903641	-0.132014	-0.0922556	-0.164931	0.0893027
19	-0.157321	-0.164172	-0.230661	-0.176063	-0.144496	-0.148808	-0.190171	-0.0480222	-0.119314	-0.0510975	-0.105431	-0.089064	-0.135227	-0.0950962	-0.17011	0.0885379
20	-0.159214	-0.163133	-0.229487	-0.169562	-0.152891	-0.140249	-0.189771	-0.038098	-0.114045	-0.0409191	-0.104259	-0.0848931	-0.136672	-0.098177	-0.174765	0.0886685
21	-0.161419	-0.160921	-0.2242	-0.160569	-0.159197	-0.131331	-0.188766	-0.0283073	-0.10632	-0.0308173	-0.1026	-0.0776309	-0.135957	-0.0992806	-0.177707	0.0899787
22	-0.164025	-0.157209	-0.215657	-0.150624	-0.162895	-0.122306	-0.187396	-0.0192691	-0.0967384	-0.0210231	-0.0992449	-0.0676173	-0.132978	-0.0962252	-0.178276	0.0926081
23	-0.166556	-0.151946	-0.205403	-0.141505	-0.164051	-0.112911	-0.185927	-0.0118478	-0.0865535	-0.011954	-0.0930618	-0.05585	-0.128122	-0.087888	-0.176462	0.0966812
24	-0.168053	-0.145528	-0.195075	-0.134483	-0.163042	-0.103067	-0.184714	-0.00683611	-0.0774289	-0.00404633	-0.08396	-0.0437266	-0.122222	-0.074756	-0.172768	0.102169
25	-0.167273	-0.138611	-0.18579	-0.129859	-0.160308	-0.093374	-0.183861	-0.00445087	-0.0707889	0.00251555	-0.0734988	-0.0326326	-0.116268	-0.0587067	-0.167944	0.108692
26	-0.163112	-0.131701	-0.178043	-0.127115	-0.156372	-0.0850121	-0.182867	-0.00418922	-0.0670982	0.00792831	-0.0645797	-0.0235499	-0.111075	-0.0422289	-0.162686	0.115472
27	-0.155115	-0.124869	-0.172062	-0.125523	-0.151969	-0.0791451	-0.180775	-0.00522033	-0.0655793	0.0126966	-0.0601288	-0.0167748	-0.107082	-0.0275099	-0.157338	0.121587
28	-0.14391	-0.117874	-0.168264	-0.124743	-0.147993	-0.0762371	-0.17692	-0.00701044	-0.0646649	0.0173142	-0.0615398	-0.0118653	-0.104383	-0.0158141	-0.151799	0.126263
29	-0.131203	-0.1106	-0.167313	-0.124957	-0.14522	-0.0757811	-0.171695	-0.00969859	-0.0630096	0.0218288	-0.0678821	-0.00794554	-0.102916	-0.00741025	-0.145781	0.128995
30	-0.119147	-0.103295	-0.169598	-0.12641	-0.143958	-0.076575	-0.166553	-0.0139166	-0.0603417	0.0256131	-0.076425	-0.00422852	-0.102597	-0.00186972	-0.139278	0.129443
31	-0.109232	-0.0963559	-0.17453	-0.128726	-0.14391	-0.0773634	-0.163099	-0.0202226	-0.0575601	0.0276298	-0.0840565	-0.000439356	-0.103255	0.0015799	-0.13282	0.12732
32	-0.101445	-0.089879	-0.180219	-0.130594	-0.144313	-0.0774408	-0.161954	-0.0285025	-0.0559947	0.0270903	-0.0886332	0.00320562	-0.104505	0.00387706	-0.127242	0.122424
33	-0.0943798	-0.083434	-0.184077	-0.130208	-0.144304	-0.0768561	-0.162351	-0.0377626	-0.0564074	0.0240871	-0.0894686	0.00639217	-0.105717	0.00610071	-0.123141	0.114803
34	-0.08633	-0.0763203	-0.184059	-0.126168	-0.143279	-0.0761458	-0.162733	-0.0464066	-0.0584372	0.0197513	-0.0869209	0.00912932	-0.106172	0.00938503	-0.120486	0.104963
35	-0.0765296	-0.0680828	-0.179711	-0.118117	-0.141039	-0.0758238	-0.161763	-0.0527914	-0.0608037	0.0158301	-0.0816085	0.0119211	-0.105273	0.0146464	-0.118604	0.0940559
36	-0.0656364	-0.0589184	-0.172175	-0.106668	-0.137642	-0.075978	-0.15891	-0.0557268	-0.0620519	0.0139028	-0.0739104	0.0156741	-0.102703	0.0221793	-0.116475	0.0839115
37	-0.0552149	-0.0496654	-0.163278	-0.0929496	-0.133109	-0.0762203	-0.154292	-0.0547102	-0.061368	0.0146608	-0.0640633	0.0213596	-0.0984412	0.0313799	-0.113103	0.0767001
38	-0.0467904	-0.0414478	-0.154515	-0.0782699	-0.127275	-0.0758722	-0.148226	-0.0499871	-0.0590204	0.0175855	-0.0525757	0.0294861	-0.0927071	0.0408116	-0.107931	0.0741403
39	-0.0411486	-0.0352526	-0.146692	-0.0641041	-0.119975	-0.0742479	-0.141024	-0.0425278	-0.0561649	0.0212368	-0.0404722	0.0395607	-0.0858936	0.0486817	-0.101164	0.0766277
40	-0.0381793	-0.0316792	-0.14021	-0.05203	-0.111447	-0.0709362	-0.133138	-0.0338858	-0.0541858	0.0239442	-0.0291415	0.049925	-0.0785602	0.0534756	-0.0937902	0.082893
41	-0.0371802	-0.0309668	-0.135414	-0.0433568	-0.10262	-0.0660987	-0.125392	-0.0258693	-0.0540519	0.0244969	-0.0200316	0.0581898	-0.0715055	0.0543855	-0.0872097	0.0905155
42	-0.0373442	-0.0331285	-0.132609	-0.0386781	-0.0949614	-0.0606824	-0.118942	-0.0200629	-0.0560469	0.0225297	-0.0145027	0.0620976	-0.0658019	0.051317	-0.0826516	0.0969953
43	-0.0381848	-0.0379932	-0.131819	-0.037802	-0.0898484	-0.0562877	-0.114908	-0.0174335	-0.0599424	0.018506	-0.0137681	0.0602565	-0.062628	0.0445992	-0.0808091	0.100684
44	-0.0397425	-0.0451513	-0.132636	-0.0401581	-0.0878408	-0.0545416	-0.113956	-0.0182129	-0.0652838	0.0133538	-0.0186616	0.0523486	-0.0628588	0.034709	-0.0818736	0.101064
45	-0.0425635	-0.0539963	-0.134324	-0.0453333	-0.0883611	-0.0562493	-0.116059	-0.0220032	-0.0715955	0.00788962	-0.0291229	0.038876	-0.066625	0.0222567	-0.085772	0.098433
46	-0.0474896	-0.0639441	-0.136084	-0.0532318	-0.0900704	-0.0609608	-0.120507	-0.0279421	-0.0784543	0.00231176	-0.043725	0.0208894	-0.0731694	0.00810431	-0.0922161	0.0934323
47	-0.0553	-0.0747078	-0.137326	-0.063788	-0.0916967	-0.0672955	-0.126102	-0.0348904	-0.0854912	-0.0038765	-0.0596988	-0.000116636	-0.0811391	-0.00662762	-0.100523	0.0867463
48	-0.0662652	-0.0863091	-0.137798	-0.0765528	-0.0926902	-0.0737729	-0.131413	-0.0416927	-0.0922891	-0.0113822	-0.0736013	-0.0222226	-0.0890816	-0.0208066	-0.109454	0.0790393
49	-0.0797145	-0.098795	-0.137556	-0.0905236	-0.0932485	-0.079501	-0.135054	-0.0474979	-0.0982502	-0.0203988	-0.0824251	-0.0433219	-0.0957836	-0.0335691	-0.117354	0.0709884
50	-0.0939314	-0.111875	-0.136813	-0.104306	-0.0937604	-0.0843353	-0.136024	-0.0519954	-0.102515	-0.0302116	-0.0845737	-0.0615559	-0.10028	-0.0444068	-0.122608	0.0632975
51	-0.106495	-0.124746	-0.135745	-0.116481	-0.0942048	-0.088568	-0.133995	-0.0553489	-0.104081	-0.0393863	-0.0802213	-0.0757286	-0.101749	-0.0530013	-0.12412	0.0567271
52	-0.115038	-0.136207	-0.134462	-0.126023	-0.0939616	-0.0924802	-0.129424	-0.0578594	-0.102099	-0.0463909	-0.0709493	-0.0854768	-0.0995946	-0.0590482	-0.121673	0.0521077
53	-0.118084	-0.144983	-0.133108	-0.132666	-0.0921392	-0.0960525	-0.123282	-0.0596399	-0.0962752	-0.050238	-0.0589018	-0.0912008	-0.0937807	-0.0623678	-0.115994	0.0502456
54	-0.115579	-0.150098	-0.131989	-0.137002	-0.0880945	-0.0989233	-0.11655	-0.0605976	-0.0871908	-0.0509196	-0.0459383	-0.0938137	-0.0850966	-0.0632628	-0.108558	0.0515769
55	-0.108901	-0.151216	-0.131503	-0.140162	-0.0818091	-0.100564	-0.109872	-0.0607712	-0.0764016	-0.0495055	-0.0331774	-0.0942984	-0.0749949	-0.0627731	-0.101136	0.0557308
56	-0.10038	-0.148797	-0.131813	-0.14316	-0.0739223	-0.100533	-0.103617	-0.0606665	-0.0661494	-0.0478531	-0.0210866	-0.0932363	-0.0649823	-0.0624805	-0.0952214	0.0613607
57	-0.0925199	-0.144034	-0.132553	-0.146319	-0.0654793	-0.0986299	-0.0982067	-0.0612025	-0.0587026	-0.047952	-0.00999715	-0.0906031	-0.0559722	-0.0639006	-0.0915733	0.0665537
58	-0.0872343	-0.138531	-0.132843	-0.149214	-0.0575267	-0.0948285	-0.0942178	-0.0631408	-0.0555147	-0.0511257	-0.000632922	-0.0860819	-0.0480245	-0.0677859	-0.0900113	0.0696836
59	-0.085374	-0.133846	-0.13175	-0.151169	-0.050782	-0.0891696	-0.0920493	-0.066436	-0.0566476	-0.0575126	0.00580924	-0.0797335	-0.0406568	-0.0738138	-0.0896075	0.0701121
60	-0.0867012	-0.131046	-0.128844	-0.151844	-0.0455259	-0.0818048	-0.0914507	-0.0701196	-0.0607698	-0.0661417	0.00822282	-0.0724761	-0.0333835	-0.0808197	-0.0892356	0.0681734
61	-0.0901938	-0.130419	-0.12443	-0.151427	-0.041774	-0.0732713	-0.0914039	-0.0728718	-0.0657387	-0.0754742	0.00645043	-0.0659375	-0.026048	-0.0873982	-0.0882057	0.0645155
62	-0.0944911	-0.13152	-0.119279	-0.150344	-0.0395666	-0.0647016	-0.0905443	-0.0738398	-0.0694447	-0.0840476	0.00174338	-0.0617705	-0.0187852	-0.0925375	-0.0866314	0.0594228
63	-0.0983083	-0.133576	-0.114118	-0.148892	-0.0390875	-0.0576622	-0.0878193	-0.0730245	-0.0704616	-0.0908408	-0.00364543	-0.0609293	-0.0117917	-0.0959535	-0.0852106	0.0528139
64	-0.100749	-0.135974	-0.109289	-0.147111	-0.0404408	-0.0535648	-0.0829283	-0.0709723	-0.0683007	-0.0953577	-0.00752743	-0.0633596	-0.00515948	-0.0979769	-0.0844858	0.0448913

## Sheet: SP
The data set of averaged HbOs for 20 subjects: Sportswear positive display
Data Points	Ch 1	Ch 2	Ch 3	Ch 4	Ch 5	Ch 6	Ch 7	Ch 8	Ch 9	Ch 10	Ch 11	Ch 12	Ch 13	Ch 14	Ch 15	Ch 16
1	0	0	0	0	0	0	0	0	0	0	0	0	0	0	0	0
2	-0.00288819	-0.00572795	-0.00220422	-0.0063455	-0.0041627	-0.00888747	0.00485019	0.0119318	0.000122444	-0.0124104	-0.0094669	-0.0179574	9.72523e-05	-0.00105266	-0.00747232	-0.00375535
3	-0.00803866	-0.0129666	-0.00733324	-0.0137432	-0.00804792	-0.0170336	0.0112219	0.0279487	0.0029894	-0.0212255	-0.0170983	-0.0302455	0.00347699	0.00131183	-0.0131658	-0.00415742
4	-0.0155078	-0.0205237	-0.014205	-0.0193029	-0.0102696	-0.0222923	0.0180949	0.0471562	0.00750135	-0.0241372	-0.020071	-0.034245	0.00910642	0.00736074	-0.016457	-0.000173458
5	-0.024399	-0.0269803	-0.0210292	-0.020549	-0.00981027	-0.0228247	0.0243098	0.0681204	0.0121567	-0.0206891	-0.0173391	-0.0295665	0.0154811	0.0165011	-0.0168937	0.00886477
6	-0.0332184	-0.0313768	-0.0260087	-0.0165633	-0.00619947	-0.0179003	0.0292356	0.0893002	0.0157492	-0.0122717	-0.00995067	-0.0181173	0.0213384	0.0277179	-0.0141498	0.0231551
7	-0.0406643	-0.0335514	-0.0279015	-0.0081929	0.000663972	-0.00809376	0.0328732	0.109132	0.017811	-0.00140899	-0.000238268	-0.00324403	0.0263395	0.0401551	-0.00810101	0.0421385
8	-0.0463218	-0.0340323	-0.026352	0.00258525	0.0106929	0.0051538	0.0354964	0.125999	0.0186155	0.00929714	0.00942945	0.0115446	0.0312401	0.0534004	0.000966639	0.0642514
9	-0.050628	-0.0335505	-0.0217963	0.0137493	0.0236135	0.020327	0.0373429	0.138446	0.0188096	0.0181122	0.0175785	0.0237859	0.0374482	0.0674337	0.0121743	0.087023
10	-0.0540435	-0.0324083	-0.0149747	0.0242404	0.0386596	0.0362963	0.0385094	0.145624	0.0189226	0.0246867	0.023689	0.0327122	0.0460937	0.0822345	0.0240451	0.107616
11	-0.0560979	-0.0300822	-0.00634662	0.0343974	0.0542895	0.0520902	0.0389386	0.147608	0.0191306	0.0300161	0.0277532	0.039173	0.0572715	0.0974028	0.0349254	0.123707
12	-0.0551789	-0.0253115	0.00410752	0.0454912	0.0682827	0.0663019	0.0383557	0.145328	0.0194244	0.0358435	0.0298201	0.0448814	0.0699808	0.112069	0.0436848	0.134312
13	-0.0493046	-0.0166866	0.0164616	0.0586016	0.0784908	0.076982	0.0364081	0.140283	0.0201246	0.043762	0.0299695	0.0514454	0.0828133	0.125213	0.0502984	0.140082
14	-0.0373231	-0.00341525	0.0302226	0.0736464	0.083943	0.0825415	0.0331572	0.134327	0.0222915	0.0544077	0.0286588	0.0597578	0.0948292	0.136172	0.0557963	0.142829
15	-0.0196848	0.0141654	0.0441701	0.0893313	0.0855927	0.0830329	0.0295512	0.129548	0.0277031	0.0672108	0.0271381	0.0700677	0.105812	0.144826	0.0614744	0.144487
16	0.00165281	0.0346085	0.0569203	0.104054	0.0860434	0.0805959	0.027299	0.128053	0.0381433	0.0807685	0.0274733	0.0823536	0.115739	0.151332	0.0678785	0.146177
17	0.0239667	0.055823	0.0677499	0.117	0.0883275	0.0785551	0.0281048	0.131499	0.0542646	0.093505	0.0319095	0.0964805	0.124063	0.155734	0.074364	0.147989
18	0.0446775	0.0756532	0.0769185	0.128508	0.0944931	0.0798144	0.0328037	0.140539	0.0746804	0.104177	0.0417757	0.111944	0.129639	0.157945	0.079601	0.149532
19	0.0619607	0.0922749	0.0852918	0.139502	0.104748	0.085718	0.0409696	0.154452	0.0960296	0.112029	0.0566218	0.127637	0.131512	0.158148	0.0826079	0.150689
20	0.0750091	0.104444	0.0936632	0.150574	0.117489	0.0958969	0.0511307	0.171246	0.11417	0.116764	0.0742255	0.142058	0.129892	0.157163	0.0834933	0.151983
21	0.0839559	0.111651	0.102287	0.161491	0.13002	0.108762	0.0613394	0.188285	0.12583	0.118523	0.091445	0.153822	0.126418	0.156261	0.0833257	0.154323
22	0.089506	0.114162	0.11081	0.17137	0.139532	0.12203	0.0698096	0.203152	0.129736	0.117911	0.105381	0.162091	0.123331	0.156463	0.0832874	0.15841
23	0.0924118	0.112767	0.118451	0.179203	0.143986	0.133067	0.0754657	0.21437	0.126675	0.115902	0.114204	0.16662	0.122126	0.157877	0.0838605	0.164286
24	0.0930592	0.10832	0.124408	0.184373	0.142569	0.139262	0.0782195	0.221612	0.118751	0.113525	0.117496	0.16763	0.122658	0.159614	0.0846687	0.171256
25	0.0914778	0.101389	0.128377	0.186939	0.135725	0.138776	0.0788649	0.225441	0.108486	0.111426	0.116232	0.165756	0.123405	0.160369	0.0850502	0.178144
26	0.0878489	0.0923854	0.130952	0.187696	0.124928	0.131499	0.078626	0.226829	0.0982059	0.109638	0.112446	0.162061	0.122707	0.159262	0.0848453	0.183727
27	0.0830373	0.081999	0.133471	0.187932	0.112376	0.119544	0.0786369	0.226755	0.0897073	0.107748	0.108476	0.15789	0.119996	0.156281	0.0847645	0.187163
28	0.0785771	0.0714293	0.137139	0.188816	0.100537	0.106501	0.0796187	0.226002	0.084041	0.105293	0.105943	0.154365	0.116017	0.151983	0.0860626	0.188306
29	0.0759225	0.0620117	0.14189	0.190587	0.0915256	0.095815	0.0817612	0.225059	0.0813398	0.102019	0.104919	0.151716	0.112016	0.14686	0.0897005	0.187696
30	0.075474	0.0544439	0.145834	0.192035	0.0864149	0.0892759	0.0847334	0.224127	0.08085	0.0978204	0.103889	0.148918	0.10872	0.140969	0.0955625	0.186198
31	0.0762554	0.0483972	0.146025	0.190941	0.0849502	0.0867802	0.0877112	0.223154	0.0813788	0.0926042	0.100711	0.144189	0.106103	0.134255	0.102252	0.184472
32	0.0765195	0.0429281	0.140147	0.185356	0.0859361	0.0873016	0.0896917	0.221979	0.082088	0.0864229	0.0940065	0.1362	0.103889	0.127115	0.107694	0.182685
33	0.0747864	0.0373265	0.128001	0.174937	0.0880823	0.0900255	0.0900923	0.220538	0.083086	0.0797894	0.0841638	0.125273	0.102129	0.120522	0.110206	0.18062
34	0.0704499	0.0316158	0.111665	0.161351	0.0905633	0.0946242	0.0892868	0.21895	0.085208	0.0737572	0.0732024	0.113525	0.101156	0.115421	0.109282	0.177962
35	0.0635808	0.0263052	0.0943211	0.147442	0.0929042	0.100658	0.0885454	0.217452	0.0890663	0.0695286	0.0636573	0.103721	0.101118	0.111985	0.105632	0.174479
36	0.0543643	0.0218427	0.0786334	0.135762	0.0944558	0.107012	0.0892348	0.21617	0.0941536	0.0678413	0.0572456	0.0977149	0.101687	0.109434	0.100572	0.170062
37	0.0428414	0.0182925	0.0657175	0.127378	0.0941343	0.112057	0.0917701	0.214885	0.0987951	0.0686044	0.0541345	0.0955516	0.102227	0.106568	0.0952423	0.164718
38	0.0291602	0.0153735	0.0550803	0.121544	0.0908396	0.114462	0.0951251	0.212993	0.100957	0.0709758	0.0531378	0.0957553	0.1022	0.102502	0.0901114	0.158599
39	0.0139555	0.0125648	0.0452559	0.116279	0.084235	0.113878	0.0973017	0.20971	0.0991848	0.0736822	0.0525311	0.0963538	0.101356	0.0970101	0.0848718	0.151939
40	-0.00160088	0.00916255	0.0347215	0.109493	0.0752611	0.110996	0.0964633	0.204451	0.093082	0.0754159	0.0509716	0.095871	0.0996723	0.0904623	0.0787314	0.144882
41	-0.01618	0.00443329	0.02274	0.100131	0.065964	0.107099	0.0920493	0.197208	0.0832218	0.0752345	0.0480489	0.0938194	0.0972506	0.083614	0.0710036	0.137346
42	-0.0287515	-0.00203198	0.00982494	0.088826	0.0587442	0.103485	0.0851073	0.188653	0.0708734	0.0729217	0.0443251	0.090675	0.0943646	0.0774552	0.0617135	0.129111
43	-0.0387943	-0.0100012	-0.00238862	0.0776895	0.055361	0.101021	0.0776176	0.179846	0.0577292	0.0690555	0.0409293	0.0875344	0.0915853	0.0730706	0.0517822	0.120072
44	-0.0460736	-0.0184964	-0.0118245	0.0693382	0.0561596	0.0998356	0.0712791	0.171703	0.0456618	0.0647117	0.0389969	0.0856561	0.0897778	0.0714346	0.0426722	0.110539
45	-0.0502176	-0.0259861	-0.0168317	0.0656353	0.0598608	0.099217	0.066549	0.164521	0.0364163	0.0609516	0.0392087	0.0860001	0.0898123	0.0731179	0.0357094	0.101312
46	-0.0505609	-0.0308028	-0.0167983	0.0667783	0.0641348	0.0979019	0.0626118	0.157917	0.0312928	0.0584773	0.041537	0.0888451	0.0921026	0.077973	0.0315546	0.0934221
47	-0.046455	-0.0316955	-0.0123096	0.0711455	0.0667991	0.0947723	0.0581902	0.151261	0.0309674	0.0576254	0.0451961	0.0936166	0.0962474	0.0849355	0.0300343	0.0876386
48	-0.0378356	-0.028353	-0.00483758	0.0760132	0.0670267	0.0896165	0.0525678	0.144318	0.0354609	0.0585725	0.0488462	0.0990485	0.101092	0.0922191	0.0302771	0.0840698
49	-0.0255654	-0.0216088	0.00384113	0.0788086	0.0657689	0.083421	0.0461507	0.13762	0.0442097	0.061394	0.0510959	0.103712	0.105256	0.0980399	0.0310719	0.0821761
50	-0.011213	-0.0131209	0.0123057	0.0783131	0.0650469	0.0779158	0.0403416	0.132273	0.056036	0.0658036	0.0511635	0.106681	0.107834	0.101569	0.03147	0.0812286
51	0.0034644	-0.00475238	0.0199829	0.07517	0.0665047	0.0746788	0.0368748	0.129317	0.0689037	0.0707745	0.0492987	0.107922	0.108734	0.103326	0.0313548	0.0808357
52	0.0169351	0.00199514	0.0270856	0.0713854	0.0701213	0.0742841	0.0369817	0.129102	0.0798123	0.0745104	0.0466282	0.108061	0.10835	0.104509	0.0315328	0.081187
53	0.0280012	0.00626542	0.0340173	0.0691491	0.0739672	0.0760126	0.0406744	0.131004	0.0853644	0.0750642	0.044474	0.107707	0.106858	0.105708	0.0330409	0.0828379
54	0.035788	0.00794562	0.0406034	0.0696507	0.0751393	0.0781624	0.0465714	0.133609	0.0831828	0.0713567	0.0435997	0.106842	0.103818	0.106182	0.0361211	0.0863212
55	0.0398709	0.00776718	0.0459297	0.0726967	0.0713601	0.0787753	0.0524147	0.135265	0.0733208	0.0638803	0.0438492	0.104784	0.0985469	0.104464	0.0397148	0.0918202
56	0.0404934	0.00731841	0.0489597	0.0771793	0.0622611	0.076384	0.0561649	0.134795	0.0584976	0.0545531	0.0443194	0.100712	0.0909388	0.0998045	0.0420069	0.0990704
57	0.0386834	0.00876676	0.0495381	0.0819944	0.0496797	0.0704899	0.0570254	0.132082	0.0426704	0.0457539	0.0438702	0.0943646	0.082008	0.0931613	0.0416908	0.107459
58	0.036056	0.0141016	0.0488758	0.0866831	0.0368507	0.0616805	0.0557269	0.128165	0.0289245	0.0391659	0.0415818	0.086401	0.0735653	0.0868257	0.0389111	0.116122
59	0.0342429	0.0240332	0.0491038	0.0914341	0.0270933	0.0514961	0.0540319	0.124785	0.0182274	0.03512	0.0370093	0.0782288	0.0672743	0.0830427	0.0352261	0.124057
60	0.0341154	0.0371325	0.0521347	0.0965919	0.0227129	0.0421146	0.0538399	0.123569	0.00981206	0.0326513	0.0303221	0.0714706	0.0637901	0.0827544	0.0326735	0.130327
61	0.0352095	0.0498849	0.0585362	0.102027	0.0245087	0.0357687	0.0563445	0.125268	0.00253451	0.0301533	0.0223595	0.0673466	0.0625985	0.0854342	0.0326513	0.134355
62	0.0358774	0.0580605	0.0670981	0.10678	0.0318854	0.0339937	0.0614996	0.129445	-0.0039538	0.0263466	0.014465	0.0662544	0.0625672	0.0899532	0.035339	0.13618
63	0.0342731	0.0588433	0.0753817	0.109293	0.0433096	0.0370463	0.0679503	0.134771	-0.00902708	0.0211542	0.00797914	0.0676895	0.0626888	0.0955449	0.0398883	0.136298
64	0.0297147	0.0525557	0.0810388	0.108297	0.0568299	0.0437991	0.0735478	0.139727	-0.0116591	0.0159939	0.00364823	0.0705236	0.0624752	0.102016	0.0450697	0.135118

## Sheet: SN
The data set of averaged HbOs for 20 subjects: Sportswear negative display
Data Points	Ch 1	Ch 2	Ch 3	Ch 4	Ch 5	Ch 6	Ch 7	Ch 8	Ch 9	Ch 10	Ch 11	Ch 12	Ch 13	Ch 14	Ch 15	Ch 16
1	0	0	0	0	0	0	0	0	0	0	0	0	0	0	0	0
2	-0.000128663	-0.0162206	0.00516336	-0.00755797	0.00948512	-0.00155626	-0.000286617	-0.00026329	-0.00267373	-0.0161017	0.00302704	-0.00601053	-0.0017874	-0.00375567	-0.0144071	0.00869733
3	-0.00175191	-0.0321516	0.00950715	-0.0156173	0.0208595	-0.000833884	-0.000645703	0.00116403	-0.00639495	-0.0301787	0.0047644	-0.0093123	0.00041199	-0.0050526	-0.0295735	0.0187711
4	-0.00448505	-0.0461528	0.0124443	-0.0226652	0.0311156	0.000882596	-0.00114608	0.0052942	-0.0102259	-0.0392959	0.00476283	-0.0091749	0.00564109	-0.00388842	-0.0438609	0.0301872
5	-0.00751128	-0.0563807	0.0142091	-0.026773	0.0378328	0.00238126	-0.00160851	0.0124188	-0.0131946	-0.0416529	0.00380995	-0.00544821	0.0125593	-0.000797955	-0.0555279	0.0428206
6	-0.00975754	-0.0612807	0.0153562	-0.0264872	0.0398531	0.0028565	-0.00179605	0.0219798	-0.0144191	-0.0372032	0.00338245	0.00146243	0.0200268	0.00347359	-0.0632526	0.0565357
7	-0.0100963	-0.0600694	0.0163893	-0.0214982	0.0375599	0.00217649	-0.00156167	0.0329154	-0.0133849	-0.0275089	0.00494623	0.0109108	0.0275559	0.00863641	-0.0663634	0.0712705
8	-0.00757041	-0.0530331	0.0177524	-0.0126826	0.0327082	0.000968507	-0.000942322	0.0441355	-0.0101174	-0.0149525	0.00931191	0.0222669	0.0354612	0.015306	-0.0647409	0.0870619
9	-0.00161095	-0.0414891	0.0199505	-0.00159161	0.0278021	0.000428425	-0.000214239	0.0547697	-0.00509431	-0.00170786	0.0161648	0.0348651	0.0445977	0.0247431	-0.0586386	0.103996
10	0.00779167	-0.0273453	0.0234142	0.0102078	0.0252142	0.00194724	0.000217675	0.0642444	0.00109661	0.011009	0.0239167	0.0478167	0.0558021	0.0380179	-0.0486215	0.122177
11	0.0200329	-0.0124281	0.0281529	0.0216562	0.0263689	0.00667166	8.07152e-05	0.0723191	0.00815623	0.0229946	0.0302852	0.0601363	0.0693721	0.0552603	-0.0356309	0.141625
12	0.0340409	0.00208243	0.0335788	0.0324341	0.0313038	0.0150687	-0.000539384	0.0790911	0.0163287	0.0344691	0.0336162	0.0713566	0.0848702	0.0754792	-0.0210129	0.162069
13	0.0485592	0.015727	0.0388217	0.042905	0.0388901	0.0266776	-0.00121411	0.0849011	0.026336	0.0454087	0.0341798	0.082149	0.101306	0.0968843	-0.00641873	0.182608
14	0.0623816	0.0283062	0.0432999	0.0537927	0.0476212	0.0402756	-0.00140488	0.0901851	0.0389905	0.0553601	0.0344402	0.0942866	0.117572	0.117449	0.00652907	0.201601
15	0.0744559	0.0392618	0.0470218	0.0656621	0.0564968	0.054412	-0.000691985	0.0954194	0.0545989	0.0637803	0.0378364	0.10962	0.132891	0.135484	0.0166695	0.217144
16	0.0839848	0.0475603	0.050393	0.0784927	0.0653915	0.0680521	0.00113056	0.101156	0.0724954	0.0704728	0.0467345	0.128621	0.147084	0.150174	0.0236712	0.227981
17	0.0906275	0.0523524	0.053836	0.0916424	0.0746799	0.080815	0.00401218	0.107913	0.090975	0.0756923	0.0608438	0.149494	0.16048	0.161856	0.0281199	0.234245
18	0.0946915	0.0538843	0.0575488	0.104176	0.0843915	0.092579	0.007551	0.115888	0.107795	0.0799207	0.077162	0.168565	0.173268	0.171611	0.0311409	0.23735
19	0.0969988	0.0536892	0.0614357	0.115171	0.0935937	0.102834	0.0109407	0.124724	0.121065	0.0836123	0.0914522	0.18181	0.184655	0.180252	0.0336455	0.238996
20	0.098399	0.0537202	0.0650532	0.123765	0.10051	0.110395	0.013156	0.13365	0.13005	0.0870913	0.100218	0.186633	0.192553	0.187389	0.0355541	0.240009
21	0.0992644	0.0550797	0.0676299	0.129143	0.103349	0.113923	0.013438	0.141923	0.135435	0.0905633	0.101995	0.182967	0.194423	0.191491	0.0356784	0.239952
22	0.0993368	0.0573754	0.0682972	0.130797	0.101318	0.112943	0.011783	0.149141	0.138848	0.0940314	0.0974766	0.173269	0.188933	0.191056	0.0325475	0.237762
23	0.0980075	0.059169	0.0666278	0.12905	0.0952145	0.108551	0.00908116	0.155177	0.141854	0.0971071	0.0888086	0.161509	0.177216	0.185938	0.0257615	0.232842
24	0.0948182	0.0590432	0.063164	0.125323	0.0872185	0.103149	0.0066573	0.159861	0.144988	0.0989901	0.0787226	0.151708	0.162637	0.177706	0.0168263	0.225679
25	0.0898887	0.0565277	0.0595204	0.121739	0.0800077	0.0993069	0.00553496	0.162878	0.147408	0.0988001	0.0698232	0.146583	0.149217	0.168807	0.00875538	0.217607
26	0.0841167	0.0523952	0.0578289	0.120176	0.0756493	0.0985504	0.0059939	0.164077	0.14747	0.0961407	0.064063	0.146835	0.139835	0.161305	0.00467455	0.210092
27	0.0789944	0.0482708	0.0597036	0.121398	0.0748711	0.100871	0.00775808	0.16393	0.143915	0.0914651	0.0623302	0.151266	0.1353	0.156115	0.00645357	0.204165
28	0.0760217	0.0458295	0.0652815	0.124803	0.0770626	0.105199	0.0106402	0.163683	0.136921	0.0859323	0.0643146	0.157586	0.134609	0.153093	0.0142008	0.200358
29	0.0759691	0.0460384	0.0729646	0.128902	0.0808415	0.11024	0.0149908	0.164886	0.12831	0.0808493	0.0688631	0.163466	0.1359	0.151586	0.0266029	0.198907
30	0.0783402	0.0487894	0.080154	0.132152	0.0847989	0.11511	0.0214912	0.168568	0.120719	0.0771149	0.0747183	0.167359	0.13754	0.151012	0.0415561	0.199823
31	0.0814582	0.0531084	0.0846602	0.133702	0.0879772	0.119358	0.0303868	0.174555	0.116278	0.0749972	0.0811831	0.168812	0.138836	0.151152	0.0566813	0.202769
32	0.0831106	0.0577039	0.0858483	0.133616	0.0899606	0.122672	0.0408276	0.181447	0.115598	0.0742801	0.0880609	0.168164	0.140139	0.15212	0.0697358	0.206924
33	0.0814755	0.0614594	0.084794	0.13254	0.0907703	0.124717	0.0510173	0.187221	0.117639	0.0745243	0.0950568	0.165955	0.142434	0.154168	0.0791069	0.211126
34	0.0758626	0.0636381	0.0833597	0.131076	0.0907807	0.125352	0.0591871	0.190091	0.120355	0.0752061	0.101233	0.162405	0.146741	0.157545	0.0843786	0.214322
35	0.0668828	0.0638465	0.0828943	0.129322	0.0906788	0.124983	0.0646205	0.189142	0.121626	0.0757242	0.105215	0.157334	0.153595	0.162435	0.0865091	0.215998
36	0.0559854	0.061945	0.083393	0.126867	0.091281	0.124526	0.0677326	0.184458	0.120006	0.0753941	0.105975	0.150501	0.162745	0.168913	0.0872508	0.216274
37	0.0446358	0.0579679	0.0835598	0.123127	0.0931195	0.12475	0.0690516	0.176764	0.115023	0.0735332	0.103388	0.142031	0.173001	0.176673	0.087957	0.215486
38	0.0336633	0.0520268	0.0816256	0.117759	0.0959865	0.125473	0.0680763	0.166885	0.107133	0.0696437	0.0981448	0.132597	0.182374	0.184729	0.088622	0.213632
39	0.0230965	0.0442013	0.0763106	0.11082	0.0987785	0.125295	0.0632469	0.155378	0.0974026	0.0635676	0.0912028	0.123289	0.188581	0.191393	0.0879387	0.210184
40	0.0125182	0.0345684	0.0674179	0.102641	0.099799	0.122269	0.0532884	0.142653	0.0871003	0.0555849	0.0833463	0.115237	0.189769	0.194744	0.0843541	0.204476
41	0.00166395	0.0234882	0.055852	0.0935806	0.0974028	0.115086	0.0387678	0.129359	0.0773755	0.0464705	0.0751003	0.109276	0.185109	0.193315	0.0772672	0.196357
42	-0.00912073	0.011909	0.0431808	0.0838571	0.0906966	0.103872	0.0224557	0.116643	0.0691278	0.0374773	0.0668613	0.105673	0.175011	0.186571	0.0675045	0.186601
43	-0.0188746	0.00130683	0.0310969	0.0736277	0.0800607	0.0901449	0.00814123	0.105891	0.062971	0.0301451	0.0591688	0.104131	0.161028	0.175032	0.0568529	0.176733
44	-0.0263974	-0.00685293	0.0210722	0.0632908	0.0672466	0.0760265	-0.00123824	0.098032	0.0591661	0.0258502	0.0529623	0.104052	0.145504	0.160076	0.0471299	0.168395
45	-0.0307384	-0.0117949	0.0142717	0.0537611	0.0549195	0.0633353	-0.00483425	0.092926	0.0575012	0.0252446	0.0496516	0.104974	0.130965	0.143535	0.0394848	0.162635
46	-0.0314711	-0.0137254	0.011492	0.0463842	0.0456841	0.0530544	-0.00385913	0.0893352	0.0572269	0.0278789	0.0506869	0.106747	0.119307	0.127175	0.0342265	0.159514
47	-0.0286729	-0.0135007	0.0129544	0.0424383	0.0409924	0.0452904	-0.000564393	0.0855746	0.0571344	0.0322962	0.0566733	0.109222	0.111222	0.112307	0.0310281	0.158223
48	-0.0227854	-0.0119943	0.0180316	0.0424884	0.0405669	0.0395965	0.00293411	0.0803995	0.0558536	0.036652	0.0665721	0.11174	0.106292	0.0997818	0.0291726	0.157564
49	-0.0145879	-0.00972811	0.0252056	0.0460152	0.0427138	0.0353259	0.00527078	0.073611	0.0523519	0.0395109	0.0776237	0.112958	0.103689	0.0902714	0.0277246	0.156565
50	-0.00523966	-0.00698152	0.0325652	0.0515931	0.0453767	0.0319056	0.0058299	0.0660476	0.0465252	0.0403969	0.086353	0.11144	0.102848	0.0844688	0.0258326	0.154945
51	0.00380243	-0.0041464	0.038636	0.0574885	0.0472619	0.0289935	0.00444754	0.0589927	0.0395782	0.0397781	0.0901363	0.106625	0.103525	0.0828563	0.023183	0.153224
52	0.0111975	-0.00176147	0.043054	0.0623681	0.048347	0.0265926	0.0012647	0.0534226	0.0337682	0.0386481	0.0884506	0.0994883	0.105304	0.085199	0.0203159	0.152401
53	0.0163593	-8.61661e-05	0.0465673	0.0657323	0.0494922	0.0250689	-0.00316298	0.0495831	0.03144	0.0380149	0.0829623	0.0923267	0.107133	0.0901606	0.0183435	0.153304
54	0.0197876	0.00128045	0.0503145	0.0678666	0.0515591	0.0250576	-0.00772678	0.0472069	0.0337247	0.0384686	0.0763543	0.0877229	0.107415	0.0954572	0.0180802	0.155916
55	0.0226443	0.00307747	0.0548633	0.0693307	0.0546991	0.0271627	-0.010938	0.0460999	0.0396517	0.0398559	0.0707133	0.0872854	0.104703	0.0986131	0.0192541	0.159189
56	0.0257452	0.00543079	0.0596237	0.0702563	0.0582632	0.0315658	-0.0115186	0.0465092	0.0463467	0.0411921	0.066532	0.0908283	0.0984941	0.0979705	0.0205153	0.161529
57	0.0288252	0.00713418	0.0630423	0.0699715	0.0612366	0.0376658	-0.00912261	0.0488428	0.0503533	0.0410284	0.0629482	0.0963982	0.0896868	0.0934698	0.0202972	0.16168
58	0.0308506	0.00606156	0.0634122	0.0672421	0.0628069	0.0440581	-0.00466332	0.0529098	0.0493996	0.0382738	0.0587913	0.101079	0.0803169	0.0866535	0.0178114	0.159362
59	0.0311368	0.000602647	0.0597674	0.0609962	0.0627734	0.0490118	0.000184958	0.0574531	0.0436289	0.0330014	0.0535654	0.102257	0.0727641	0.0798647	0.0134476	0.155291
60	0.0302845	-0.00900896	0.0524777	0.0510842	0.0616843	0.0512634	0.00399766	0.0604689	0.0355635	0.0265953	0.0477366	0.098785	0.0687745	0.0750939	0.0083325	0.150594
61	0.0300459	-0.0205955	0.0432909	0.0385836	0.0606554	0.0505876	0.00639584	0.0602409	0.0287994	0.0210292	0.0423508	0.0914649	0.0689252	0.0732462	0.00361923	0.146167
62	0.0323265	-0.0311931	0.034953	0.025609	0.0608468	0.0477264	0.00795303	0.0563366	0.0261246	0.0177675	0.0383944	0.0825626	0.0727871	0.0741896	3.71148e-05	0.142364
63	0.0380261	-0.0386254	0.0303805	0.0147202	0.0627534	0.0437232	0.0093086	0.0497897	0.0280645	0.0170139	0.0362962	0.0746416	0.0794815	0.0772957	-0.00219426	0.139082
64	0.0465618	-0.0423526	0.0317193	0.00822555	0.065785	0.039253	0.0102586	0.042346	0.0325875	0.0176971	0.0357405	0.0694187	0.0880782	0.0818506	-0.00340318	0.13592
